# Supplementary material for: Core fucosylation within the Fc-FcγR degradation pathway promotes enhanced IgG levels via exogenous L-fucose
Source: PubMed Central journal article supplement (PMC11345378; doi:10.1016/j.jbc.2024.107558), 2024-07-11

| No. | peptide   | Retention time (min) | observed mass |          |          | calculated mass | theoretical mass |          |          | $\Delta$ mass     | Structure         | mass range for EIC ( $\pm$ 6ppm) | Intensity | relative |
|-----|-----------|----------------------|---------------|----------|----------|-----------------|------------------|----------|----------|-------------------|-------------------|----------------------------------|-----------|----------|
|     |           |                      | M+4H          | M+3H     | M+2H     |                 | M+4H             | M+3H     | M+2H     |                   |                   |                                  |           |          |
| 1   | EEQFNSTFR | 36.69                |               | 1118.964 | 2236.920 | 746.313         | 1118.966         | 2236.924 | -0.004   | H2N3F1            | 1118.959-1118.973 | 1176.3                           | 0.10      |          |
| 2   |           | 36.43                |               | 1199.992 | 2398.976 | 800.331         | 1199.992         | 2398.977 | -0.001   | H3N3F1            | 1199.985-1199.999 | 13395.4                          | 1.15      |          |
| 3   |           | 36.18                |               | 1281.021 | 2561.034 | 854.349         | 1281.019         | 2561.030 | 0.004    | H4N3F1            | 1281.011-1281.027 | 3337.6                           | 0.29      |          |
| 4   |           | 36.46                |               | 1301.534 | 2602.060 |                 |                  |          | 0.004    |                   |                   | 1301.524-1301.540                | 94146.7   | 8.10     |
|     |           | 36.46                | 868.025       |          | 2602.059 |                 | 868.024          | 1301.532 | 2602.056 | 0.003             | H3N4F1            | 868.019-868.029                  | 131993.4  | 11.36    |
| 5   |           | 36.21                |               |          | 1382.560 | 2764.112        |                  |          |          | 0.003             |                   | 1382.550-1382.566                | 36295.6   | 3.12     |
|     |           | 36.21                | 922.043       |          | 2764.113 |                 | 922.042          | 1382.558 | 2764.109 | 0.004             | H4N4F1            | 922.036-922.048                  | 88820.2   | 7.64     |
| 6   |           | 36.46                | 935.718       |          | 2805.138 |                 | 935.717          | 1403.071 | 2805.135 | 0.003             | H3N5F1            | 935.711-935.723                  | 8030.2    | 0.69     |
| 7   |           | 37.37                | 956.713       |          | 2868.123 |                 | 956.712          | 1434.564 | 2868.120 | 0.003             | H4N3FIG1          | 956.706-956.718                  | 1832.2    | 0.16     |
| 8   |           | 36.12                |               | 1463.588 | 2926.168 |                 |                  |          |          | 0.006             |                   | 1463.576-1463.594                | 5494.9    | 0.47     |
|     |           | 36.12                | 976.060       |          | 2926.164 |                 | 976.059          | 1463.585 | 2926.162 | 0.003             | H5N4F1            | 976.053-976.065                  | 18563.5   | 1.60     |
| 9   |           | 36.21                | 989.736       |          | 2967.192 |                 | 989.735          | 1484.098 | 2967.188 | 0.004             | H4N5F1            | 989.729-989.741                  | 1555.4    | 0.13     |
| 10  |           | 37.15                |               | 1536.107 | 3071.206 |                 |                  |          |          | 0.007             |                   | 1536.095-1536.113                | 8918.4    | 0.77     |
|     |           | 37.15                | 1024.406      |          | 3071.202 |                 | 1024.405         | 1536.103 | 3071.199 | 0.003             | H4N4FIG1          | 1024.399-1024.411                | 61593     | 5.30     |
| 11  |           | 37.03                |               | 1617.134 | 3233.260 | 1078.423        | 1617.130         | 3233.252 | 0.008    | H5N4FIG1          | 1617.120-1617.140 | 9514.8                           | 0.82      |          |
| 12  |           | 37.12                | 1092.100      |          | 3274.284 | 1092.098        | 1637.643         | 3274.278 | 0.007    | H4N5FIG1          | 1092.091-1092.105 | 970.3                            | 0.08      |          |
| 13  |           | 36.97                | 1132.441      |          | 3395.307 | 1132.440        | 1698.156         | 3395.305 | 0.002    | H6N4FIG1          | 1132.433-1132.447 | 2088.5                           | 0.18      |          |
| 14  |           | 37.71                |               | 1770.677 | 3540.346 |                 |                  |          |          | 0.004             |                   | 1770.664-1770.686                | 15271.9   | 1.31     |
|     |           | 37.77                | 1180.787      |          | 3540.345 |                 | 1180.786         | 1770.675 | 3540.342 | 0.003             | H5N4FIG2          | 1180.779-1180.793                | 1292.2    | 0.11     |
| 15  |           | 36.52                |               | 1228.504 | 2456.000 |                 |                  |          |          | 0.002             |                   | 1228.496-1228.510                | 5557.8    | 0.48     |
|     |           | 36.85                | 819.338       |          | 2455.998 |                 | 819.338          | 1228.503 | 2455.998 | 0.000             | H3N4              | 819.333-819.343                  | 7250.2    | 0.62     |
| 16  |           | 36.37                |               | 1309.534 | 2618.060 |                 |                  |          |          | 0.009             |                   | 1309.521-1309.537                | 2745.2    | 0.24     |
|     |           | 36.43                | 873.356       |          | 2618.052 |                 | 873.356          | 1309.529 | 2618.051 | 0.001             | H4N4              | 873.351-873.361                  | 2149.8    | 0.18     |
| 17  |           | 37.53                | 975.720       |          | 2925.144 |                 | 975.719          | 1463.074 | 2925.141 | 0.003             | H4N4G1            | 975.713-975.725                  | 2015.3    | 0.17     |
| 18  |           | a                    | 30.95         |          | 1119.962 | 2238.916        |                  |          |          | 0.003             |                   | 1119.954-1112.968                | 1855.2    | 0.16     |
|     |           | b                    | 31.11         |          | 1119.961 | 2238.914        | 746.976          | 1119.960 | 2238.913 | 0.001             | H3N3F1            |                                  | 1910.8    | 0.16     |
| 19  |           | 30.71                |               | 1200.990 | 2400.972 | 800.994         | 1200.987         | 2400.966 | 0.006    | H4N3F1            | 1200.980-1200.994 | 1835.8                           | 0.16      |          |
| 20  |           | a                    | 30.45         |          | 1221.502 | 2441.996        |                  |          |          | 0.003             |                   | 1221.493-1221.507                | 28718.4   | 2.47     |
|     |           | b                    | 30.93         |          | 1221.502 | 2441.996        |                  |          |          | 0.003             |                   |                                  | 40401.4   | 3.48     |
|     |           | a                    | 30.45         | 814.67   |          | 2441.994        | 814.670          | 1221.500 | 2441.993 | 0.001             | H3N4F1            |                                  | 17007.8   | 1.46     |
|     |           | b                    | 30.93         | 814.670  |          | 2441.994        |                  |          |          | 0.001             |                   | 814.664-814.674                  | 35096.8   | 3.02     |
| 21  |           | a                    | 30.18         |          | 1302.528 | 2604.048        |                  |          |          | 0.003             |                   | 1302.519-130.535                 | 34176.5   | 2.94     |
|     |           | b                    | 30.74         |          | 1302.529 | 2604.050        |                  |          |          | 0.005             |                   |                                  | 54564.8   | 4.69     |
|     |           | a                    | 30.74         | 868.687  |          | 2604.045        | 868.687          | 1302.526 | 2604.045 | 0.000             | H4N4F1            |                                  | 35727.2   | 3.07     |
|     | b         | 30.77                | 868.687       |          | 2604.045 |                 |                  |          | 0.000    |                   | 868.682-868.692   | 77318.9                          | 6.65      |          |
| 22  | 30.61     | 882.359              |               | 2645.061 | 882.363  | 1323.040        | 2645.072         | -0.011   | H3N5F1   | 882.357-882.367   | 1408.7            | 0.12                             |           |          |
| 23  | a         | 30.12                |               | 1383.554 | 2766.100 |                 |                  |          | 0.002    |                   | 1383.545-1383.561 | 10473.5                          | 0.90      |          |
|     | b         | 30.61                |               | 1383.554 | 2766.100 |                 |                  |          | 0.002    |                   |                   | 8950.5                           | 0.77      |          |
|     | a         | 30.12                | 922.705       |          | 2766.099 | 922.705         | 1383.553         | 2766.098 | 0.001    | H5N4F1            |                   | 10480.2                          | 0.90      |          |
|     | b         | 30.64                | 922.705       |          | 2766.099 |                 |                  |          | 0.001    |                   | 922.699-922.711   | 15168.0                          | 1.30      |          |
| 24  | a         | 30.71                |               | 1456.074 | 2911.140 |                 |                  |          | 0.004    |                   | 1456.063-1456.081 | 7895.5                           | 0.68      |          |
|     | b         | 31.28                |               | 1456.074 | 2911.140 |                 |                  |          | 0.004    |                   |                   | 7017.8                           | 0.60      |          |
|     | a         | 30.77                | 971.051       |          | 2911.137 | 971.051         | 1456.072         | 2911.136 | 0.001    | H4N4FIG1          |                   | 28559.1                          | 2.46      |          |
|     | b         | 31.28                | 971.050       |          | 2911.134 |                 |                  |          | -0.002   |                   | 971.044-971.056   | 12422.2                          | 1.07      |          |
| 25  | a         | 30.67                |               | 1537.099 | 3073.190 |                 |                  |          | 0.002    |                   | 1537.089-1537.107 | 9201.7                           | 0.79      |          |
|     | b         | 31.17                |               | 1537.101 | 3073.194 |                 |                  |          | 0.006    |                   |                   | 5107.7                           | 0.44      |          |
|     | a         | 30.64                | 1025.068      |          | 3073.188 | 1025.068        | 1537.098         | 3073.188 | 0.000    | H5N4FIG1          |                   | 38542.1                          | 3.32      |          |
|     | b         | 31.17                | 1025.069      |          | 3073.191 |                 |                  |          | 0.003    |                   | 1025.062-1025.074 | 30057.3                          | 2.59      |          |
| 26  | 30.95     | 1038.745             |               | 3114.219 | 1038.744 | 1557.611        | 3114.215         | 0.004    | H4N5FIG1 | 1038.738-1038.750 | 2273.1            | 0.20                             |           |          |
| 27  | a         | 30.99                |               | 1690.644 | 3380.280 |                 |                  |          | 0.001    |                   | 1690.633-1690.653 | 2751.7                           | 0.24      |          |
|     | a         | 31.08                | 1127.433      |          | 3380.283 | 1127.432        | 1690.643         | 3380.279 | 0.004    | H5N4FIG2          |                   | 11532.8                          | 0.99      |          |
|     | b         | 31.49                | 1127.433      |          | 3380.283 |                 |                  |          | 0.004    |                   | 1127.424-1127.438 | 5947.6                           | 0.51      |          |
| 28  | 32.11     |                      | 1178.986      | 2356.964 | 786.327  | 1178.987        | 2356.966         | -0.002   | H3N3F1   | 1178.980-1178.994 | 2047.3            | 0.18                             |           |          |
| 29  | 32.05     |                      | 1280.529      | 2560.050 |          |                 |                  |          | 0.004    |                   | 1280.519-1280.535 | 21012.8                          | 1.81      |          |
|     | 32.05     | 854.021              |               | 2560.047 |          | 854.021         | 1280.527         | 2560.046 | 0.001    | H3N4F1            | 854.015-854.025   | 27996.6                          | 2.41      |          |
|     | 31.89     |                      | 1361.556      | 2722.104 |          |                 |                  |          | 0.006    |                   | 1361.545-1361.561 | 10361.3                          | 0.89      |          |
| 30  | 31.93     | 908.039              |               | 2722.101 |          | 908.038         | 1361.553         | 2722.098 | 0.003    | H4N4F1            | 908.033-908.043   | 21290.7                          | 1.83      |          |
|     | 31.77     |                      | 1442.584      | 2884.160 |          |                 |                  |          | 0.009    |                   | 1442.571-1442.589 | 2226.9                           | 0.19      |          |
| 31  | 31.80     | 962.057              |               | 2884.155 |          | 962.056         | 1442.579         | 2884.151 | 0.004    | H5N4F1            | 962.050-962.062   | 6087.4                           | 0.52      |          |
|     | 32.75     | 1010.402             |               | 3029.190 | 1010.402 | 1515.098        | 3029.189         |          | 0.001    | H4N4FIG1          | 1010.395-1010.407 | 4199                             | 0.36      |          |
| 33  | 32.55     | 1064.420             |               | 3191.244 | 1064.419 | 1596.125        | 3191.242         | 0.002    | H5N4FIG1 | 1064.413-1064.425 | 5529.7            | 0.48                             |           |          |
| 34  | 33.09     | 1166.786             |               | 3498.342 | 1166.783 | 1749.670        | 3498.332         | 0.010    | H5N4FIG2 | 1166.775-1166.789 | 1303.9            | 0.11                             |           |          |
|     |           |                      |               |          |          |                 |                  |          |          |                   | total             | 1162399.5                        | 100       |          |

◇ Neuraminic acid (Neu)
   
   ◆ N-acetyl neuraminic acid (NeuAc)
   
   ◆ N-glycolyl neuraminic acid (NeuGc)
   
 ○ Hexose (Hex)
   
   ● Galactose (Gal)
   
   ● Mannose (Man)
   
 □ N-acetyl hexosamine (HexNAc)
   
   ■ N-acetyl glucosamine (GlcNAc)
   
   ■ N-acetyl galactosamine (GalNAc)
   
 ▷ Deoxy hexose (dHex)
   
   ▶ Fucose (Fuc)
   
 ~ Peptide

LC-MS analysis of N-glycans on IgGs obtained from *Fut8*<sup>+/-</sup> mice before treatment with 0.15 mg/g/day L-fucose\_0<sup>th</sup> day (A-0).

| No.   | peptide   | Retention time (min) | observed mass |          |          |          | calculated mass |          | theoretical mass |          |                   | $\Delta$ mass      | Structure         | mass range for EIC ( $\pm$ 6ppm) | Intensity | relative |
|-------|-----------|----------------------|---------------|----------|----------|----------|-----------------|----------|------------------|----------|-------------------|--------------------|-------------------|----------------------------------|-----------|----------|
|       |           |                      | M+4H          | M+3H     | M+2H     | M+H      | M+3H            | M+2H     | M+H              |          |                   |                    |                   |                                  |           |          |
| 1     |           | 36.10                |               |          | 1118.971 | 2236.934 | 746.313         | 1118.966 | 2236.924         | 0.010    | H2N3F1            | 1118.973-1118.973  | 3129.2            | 0.13                             |           |          |
|       |           | 36.23                |               |          | 1199.993 | 2398.978 | 800.331         | 1199.992 | 2398.977         | 0.001    | H3N3F1            | 1199.985-1199.999  | 4511.7            | 0.18                             |           |          |
| 2     |           | 36.31                |               | 800.331  |          |          |                 |          | 0.000            |          | 800.326-800.336   | 19375.5            | 0.79              |                                  |           |          |
| 3     |           | 35.93                |               |          | 1281.019 | 2561.030 | 854.349         | 1281.019 | 2561.03          | 0.000    | H4N3F1            | 1281.011-1281.027  | 5014.8            | 0.20                             |           |          |
| 4     |           | 36.20                |               |          | 1301.534 | 2602.060 | 868.024         | 1301.532 | 2602.056         | 0.004    | H3N4F1            | 1301.524-1301.540  | 198760.2          | 8.08                             |           |          |
|       |           | 36.20                |               | 868.025  |          |          |                 |          |                  | 0.003    |                   | 868.019-868.029    | 199516.5          | 8.11                             |           |          |
| 5     |           | 35.93                |               |          | 1382.560 | 2764.112 |                 | 1382.558 | 2764.109         | 0.003    | H4N4F1            | 1382.550-1382.566  | 69663.2           | 2.83                             |           |          |
|       |           | 35.96                |               | 922.043  |          |          |                 |          |                  | 0.004    |                   | 922.036-922.048    | 101437.2          | 4.12                             |           |          |
| 6     |           | 36.26                |               |          | 1403.074 | 2805.140 |                 | 1403.071 | 2805.135         | 0.005    | H3N5F1            | 1403.64-1403.080   | 5039.6            | 0.20                             |           |          |
|       |           | 36.17                |               | 935.718  |          |          |                 |          |                  | 0.003    |                   | 935.711-935.723    | 120011.4          | 4.88                             |           |          |
| 7     |           | 36.02                |               |          | 1463.588 | 2926.168 |                 | 1463.585 | 2926.162         | 0.006    | H5N4F1            | 14463.576-1463.594 | 16463.5           | 0.67                             |           |          |
|       |           | 35.93                |               | 976.060  |          |          |                 |          |                  | 0.002    |                   | 976.053-976.065    | 5494.9            | 0.22                             |           |          |
| 8     | EEQFNSTFR | 35.99                |               | 989.738  |          | 2967.198 | 989.735         | 1484.098 | 2967.188         | 0.010    | H4N5F1            | 989.729-989.741    | 3943.4            | 0.16                             |           |          |
| 9     |           |                      | 37.00         |          |          | 1536.106 | 3071.204        |          | 1536.103         | 3071.199 | 0.005             | H4N4F1G            | 1536.095-1536.113 | 31232.6                          | 1.27      |          |
| 37.00 |           |                      |               | 1024.406 |          |          |                 |          |                  | 0.003    |                   | 1024.399-1024.411  | 77867.2           | 3.16                             |           |          |
| 10    |           |                      | 35.90         |          |          | 1463.588 | 2926.168        | 976.059  | 1463.585         | 2926.162 | 0.006             | H5N4F1             | 1463.576-1463.594 | 9885.4                           | 0.40      |          |
| 36.81 |           |                      |               |          | 1617.131 | 3233.254 | 1078.423        | 1617.130 | 3233.252         | 0.002    | H5N4F1G           | 1617.120-1617.140  | 7554.9            | 0.31                             |           |          |
| 11    |           |                      | 36.78         |          |          |          | 3233.256        |          |                  | 0.004    |                   | 1078.417-1078.429  | 49825.1           | 2.02                             |           |          |
| 36.97 |           |                      |               | 1078.424 |          |          |                 |          |                  | -0.001   | H4N5F1G           | 1092.091-1092.105  | 2824.9            | 0.11                             |           |          |
| 12    |           |                      | 36.46         |          |          |          | 3395.298        | 1132.440 | 1698.156         | 3395.305 | -0.007            | H6N4F1G            | 1132.433-1132.447 | 1854.4                           | 0.08      |          |
| 37.59 |           |                      |               |          | 1770.681 |          | 3540.354        | 1180.786 | 1770.675         | 3540.342 | 0.012             | H5N4F1G            | 1770.664-1770.686 | 2553.9                           | 0.10      |          |
| 14    |           |                      | 37.53         |          | 1180.787 |          | 3540.345        |          |                  |          | 0.003             |                    | 1180.779-1180.793 | 21041.1                          | 0.86      |          |
| 36.52 |           |                      |               |          |          | 1228.505 | 2456.002        | 819.338  | 1228.503         | 2455.998 | 0.004             | H3N4               | 1228.496-1228.510 | 7250.2                           | 0.29      |          |
| 15    |           |                      | 36.37         |          |          | 1309.534 | 2618.060        |          | 1309.529         | 2618.051 | 0.009             | H4N4               | 1309.521-1309.537 | 2745.2                           | 0.11      |          |
| 36.43 |           |                      |               | 873.356  |          |          | 2618.052        | 873.356  |                  |          | 0.001             |                    | 873.351-873.361   | 2149.8                           | 0.09      |          |
| 16    |           |                      | 37.53         |          | 975.720  |          | 2925.144        | 975.719  | 1463.074         | 2925.141 | 0.003             | H4N4G1             | 975.713-975.725   | 2015.3                           | 0.08      |          |
| 30.66 |           |                      |               |          |          | 1119.962 | 2238.916        | 746.976  | 1119.960         | 2238.913 | 0.003             | H3N3F1             | 1119.954-1119.968 | 3561.5                           | 0.14      |          |
| 19    |           | a                    | 29.75         |          |          | 1200.989 | 2400.970        |          |                  |          | 0.004             |                    |                   | 4494.1                           | 0.18      |          |
|       |           |                      | 30.55         |          |          | 1200.990 | 2400.972        | 800.994  | 1200.987         | 2400.966 | 0.006             | H4N3F1             | 1200.980-1200.968 | 2173.4                           | 0.09      |          |
| 20    |           | b                    | 29.97         |          |          | 1221.502 | 2441.996        |          |                  |          | 0.003             |                    | 1221.493-1221.507 | 20743.2                          | 0.84      |          |
|       | 30.60     |                      |               |          | 1221.502 | 2441.996 | 814.670         | 1221.500 | 2441.993         | 0.003    | H3N4F1            |                    | 60698.5           | 2.47                             |           |          |
|       | 29.97     |                      | 814.671       |          |          | 2441.997 |                 |          | 0.004            |          | 814.664-814.674   | 13111.7            | 0.53              |                                  |           |          |
|       | 30.57     |                      | 814.670       |          |          | 2441.994 |                 |          | 0.001            |          |                   | 65069.0            | 2.64              |                                  |           |          |
| 21    | a         | 29.78                |               |          | 1302.528 | 2604.048 |                 |          |                  | 0.003    |                   | 1302.519-1302.535  | 189680.7          | 7.46                             |           |          |
|       |           | 30.35                |               |          | 1302.528 | 2604.048 |                 |          |                  | 0.003    |                   |                    | 112894            | 4.59                             |           |          |
|       | 29.79     |                      | 868.687       |          |          | 2604.045 | 868.687         | 1302.526 | 2604.045         | 0.000    | H4N4F1            |                    | 145345.6          | 5.91                             |           |          |
|       | 30.32     |                      | 868.688       |          |          | 2604.048 |                 |          | 0.003            |          |                   | 106375.5           | 4.32              |                                  |           |          |
| 22    |           | 30.29                |               |          | 882.363  | 2645.073 | 882.363         | 1323.040 | 2645.072         | 0.001    | H3N5F1            | 882.358-882.368    | 5913.5            | 0.24                             |           |          |
| 30.66 |           |                      |               | 1354.535 | 2708.062 | 903.357  | 1354.532        | 2708.056 | 0.006            | H4N3F1G  | 1354.524-1354.540 | 1475.3             | 0.06              |                                  |           |          |
| 23    | EDYNSTLR  | 31.19                |               | 903.360  |          | 2708.064 |                 |          | 0.008            |          | 903.352-903.362   | 1306.7             | 0.05              |                                  |           |          |
| 24    |           | a                    | 29.78         |          |          | 1383.555 | 2766.102        |          |                  |          | 0.004             |                    |                   | 37207.6                          | 1.51      |          |
|       |           |                      | 30.25         |          |          | 1383.554 | 2766.100        |          |                  |          | 0.002             |                    | 1383.545-1383.561 | 24186.8                          | 0.98      |          |
| 24    |           | b                    | 29.72         |          | 922.705  |          | 2766.099        | 922.705  | 1383.553         | 2766.098 | 0.001             | H5N4F1             |                   | 47688.9                          | 1.94      |          |
|       |           |                      | 30.42         |          | 922.705  |          | 2766.099        |          |                  |          | 0.001             |                    | 922.699-922.711   | 24957.2                          | 1.01      |          |
| 25    |           | a                    | 30.42         |          |          | 1456.074 | 2911.140        |          |                  |          | 0.004             |                    | 1456.063-1456.081 | 20015.7                          | 0.81      |          |
|       |           |                      | 30.95         |          |          | 1456.074 | 2911.140        |          |                  |          | 0.004             |                    |                   | 9150.3                           | 0.37      |          |
|       |           | 30.35                |               | 971.052  |          |          | 2911.140        | 971.051  | 1456.072         | 2911.136 | 0.004             | H4N4F1G            |                   | 47618                            | 1.94      |          |
|       |           | 31.01                |               | 971.051  |          |          | 2911.137        |          |                  | 0.001    |                   | 971.044-971.056    | 20998.8           | 0.85                             |           |          |
| 26    |           | a                    | 30.25         |          |          | 1537.099 | 3073.190        |          |                  |          | 0.002             |                    | 1537.089-1537.107 | 23204.7                          | 0.94      |          |
|       |           |                      | 30.81         |          |          | 1537.101 | 3073.194        | 1025.068 | 1537.098         | 3073.188 | 0.006             | H5N4F1G            |                   | 12838                            | 0.52      |          |
|       |           | 30.29                |               | 1025.069 |          |          | 3073.191        |          |                  | 0.003    |                   | 1025.062-1025.074  | 76659.8           | 3.12                             |           |          |
|       | 30.84     |                      | 1025.069      |          |          | 3073.191 |                 |          | 0.003            |          |                   | 37543.7            | 1.53              |                                  |           |          |
| 27    |           | 30.72                |               |          | 1690.650 | 3380.292 | 1127.432        | 1690.643 | 3380.279         | 0.013    | H5N4F1G           | 1690.633-1690.653  | 5010.6            | 0.20                             |           |          |
|       |           | 30.72                |               | 1127.433 |          |          | 3380.283        |          |                  | 0.004    |                   | 1127.424-1127.438  | 28540.8           | 1.16                             |           |          |
| 28    | EAQYNSTFR | 31.76                |               |          | 1178.987 | 2356.966 | 786.327         | 1178.987 | 2356.966         | 0.000    | H3N3F1            | 1178.981-1178.994  | 5447.3            | 0.22                             |           |          |
| 31.91 |           |                      | 786.327       |          |          | 2356.965 |                 |          | -0.001           |          | 786.322-786.332   | 1456.4             | 0.06              |                                  |           |          |
| 29    |           |                      | 31.51         |          |          | 1260.019 | 2519.030        | 840.345  | 1260.013         | 2519.019 | 0.011             | H4N3F1             | 1260.005-1260.021 | 2353.7                           | 0.10      |          |
| 31.76 |           |                      |               |          | 1280.529 | 2560.050 | 854.021         | 1280.527 | 2560.046         | 0.004    | H3N4F1            | 1280.519-1280.535  | 76962             | 3.13                             |           |          |
| 30    |           |                      | 31.76         |          | 854.021  |          | 2560.047        |          |                  | 0.001    |                   | 854.015-854.025    | 79266.8           | 3.22                             |           |          |
|       |           |                      | 31.60         |          |          | 1361.556 | 2722.104        |          |                  |          | 0.006             | H4N4F1             | 1361.545-1361.561 | 42202.4                          | 1.72      |          |
| 31    |           |                      | 31.60         |          | 908.039  |          | 2722.101        | 908.038  | 1361.553         | 2722.098 | 0.003             | H4N4F1             | 908.033-908.043   | 67316.2                          | 2.74      |          |
|       |           |                      | 31.51         |          |          | 1442.583 | 2884.158        |          |                  |          | 0.007             |                    | 1442.571-1442.589 | 8924.7                           | 0.36      |          |
| 32    |           |                      | 31.51         |          | 962.057  |          | 2884.155        | 962.056  | 1442.579         | 2884.151 | 0.004             | H5N4F1             | 962.050-962.062   | 21703                            | 0.88      |          |
|       |           |                      | 32.44         |          |          | 1515.101 | 3029.194        | 1010.402 | 1515.098         | 3029.189 | 0.005             | H4N4F1G            | 1515.089-1515.107 | 5465.8                           | 0.22      |          |
| 33    |           |                      | 32.44         |          | 1010.402 |          | 3029.190        |          |                  | 0.001    |                   | 1010.395-1010.407  | 16763.4           | 0.68                             |           |          |
|       |           |                      | 32.29         |          |          | 1596.130 | 3191.252        | 1064.419 | 1596.125         | 3191.242 | 0.010             | H5N4F1G            | 1596.115-1596.135 | 2839.3                           | 0.12      |          |
| 34    |           |                      | 32.23         |          | 1064.419 |          | 3191.241        |          |                  | -0.001   |                   | 1064.413-1064.425  | 10966.9           | 0.45                             |           |          |
|       |           |                      | 32.98         |          | 1166.784 |          | 3498.336        | 1166.783 | 1749.670         | 3498.332 | 0.004             | H5N4F1G            | 1166.775-1166.789 | 5351.5                           | 0.22      |          |
| 35    |           |                      |               |          |          |          |                 |          |                  |          |                   | total              | 246064.1          | 100                              |           |          |

LC-MS analysis of N-glycans on IgGs obtained from *Fut8*<sup>-/-</sup> mice treated with 0.15 mg/g/day L-fucose on the 7<sup>th</sup> day (A-7).

| No. | peptide   | Retention time (min) | observed mass |          |          |          | calculated mass | theoretical mass |          |          | $\Delta$ mass | Structure         | mass range for EIC ( $\pm$ 6ppm) | Intensity         | relative          |         |
|-----|-----------|----------------------|---------------|----------|----------|----------|-----------------|------------------|----------|----------|---------------|-------------------|----------------------------------|-------------------|-------------------|---------|
|     |           |                      | M+4H          | M+3H     | M+2H     | M+H      | M+3H            | M+2H             | M+H      |          |               |                   |                                  |                   |                   |         |
| 1   | EEQFNSTFR | 36.08                |               |          | 1118.968 | 2236.928 | 746.313         | 1118.966         | 2236.924 | 0.004    | H2N3F1        | 1118.959-1118.973 | 5370.6                           | 0.12              |                   |         |
| 2   |           | 36.08                |               |          | 1199.994 | 2398.980 |                 |                  | 800.331  | 1199.992 | 2398.977      | 0.003             | H3N3F1                           | 1199.985-1199.999 | 29294.3           | 0.66    |
|     |           | 36.25                |               | 800.331  |          |          |                 |                  |          |          |               | 0.000             |                                  | 800.326-800.336   | 3238.5            | 0.07    |
| 3   |           | 35.90                |               |          |          | 1281.021 | 2561.034        | 854.349          | 1281.019 | 2561.030 | 0.004         | H4N3F1            | 1281.011-1281.027                | 5818.5            | 0.13              |         |
|     |           | 36.05                |               |          |          | 1301.534 | 2602.060        |                  |          | 868.024  | 1301.532      | 2602.056          | 0.004                            | H3N4F1            | 1301.524-1301.540 | 411288  |
| 4   |           | 36.05                |               | 868.025  |          |          | 2602.059        |                  |          |          |               | 0.003             |                                  | 868.019-868.029   | 406701            | 9.19    |
|     |           | 35.85                |               |          |          | 1382.560 | 2764.112        |                  |          | 922.042  | 1382.558      | 2764.109          | 0.003                            | H4N4F1            | 1382.550-1382.566 | 140325  |
| 5   |           | 35.82                |               | 922.042  |          |          | 2764.110        |                  |          |          |               | 0.001             |                                  | 922.036-922.048   | 212101            | 4.79    |
|     |           | 35.99                |               |          |          | 1403.073 | 2805.138        |                  |          |          |               | 0.003             | H3N5F1                           | 1403.064-1403.080 | 16385.8           | 0.37    |
| 6   |           | 36.08                |               | 935.718  |          |          | 2805.138        | 935.717          | 1403.071 | 2805.135 | 0.003         | H3N5F1            | 935.711-935.723                  | 34390.9           | 0.78              |         |
|     |           | 35.70                |               |          |          | 1463.586 | 2926.164        |                  |          | 976.059  | 1463.585      | 2926.162          | 0.002                            | H5N4F1            | 1463.576-1463.594 | 21687.7 |
| 7   |           | 35.73                |               | 976.060  |          |          | 2926.164        |                  |          |          |               | 0.002             |                                  | 976.053-976.065   | 53573.4           | 1.21    |
|     |           | 35.85                |               | 989.734  |          |          | 2967.186        | 989.735          | 1484.098 | 2967.188 | -0.002        | H4N5F1            | 989.729-989.741                  | 7742              | 0.17              |         |
| 9   |           | 36.92                |               |          |          | 1536.104 | 3071.200        |                  |          |          |               | 0.001             | H4N4F1G1                         | 1536.095-1536.113 | 44176.4           | 1.00    |
|     |           | 36.89                |               | 1024.406 |          |          | 3071.202        | 1024.405         | 1536.103 | 3071.199 | 0.003         | H4N4F1G1          | 1024.399-1024.411                | 164047            | 3.71              |         |
| 10  |           | 36.68                |               |          |          | 1617.132 | 3233.256        | 1078.423         | 1617.130 | 3233.252 | 0.004         | H3N4F1G1          | 1617.120-1617.140                | 22508.4           | 0.51              |         |
|     |           | 36.62                |               | 1078.424 |          |          | 3233.256        |                  |          |          |               | 0.004             |                                  | 1078.417-1078.429 | 82010.8           | 1.85    |
| 11  |           | 36.92                |               |          |          | 1637.645 | 3274.282        | 1092.098         | 1637.643 | 3274.279 | 0.003         | H4N5F1G1          | 1637.633-1637.653                | 2014              | 0.05              |         |
|     |           | 36.95                |               | 1092.100 |          |          | 3274.284        |                  |          |          |               | 0.005             |                                  | 1092.091-1092.105 | 4167.5            | 0.09    |
| 12  |           | 37.41                |               |          |          | 1770.675 | 3540.342        | 1180.786         | 1770.675 | 3540.342 | 0.000         | H5N4F1G2          | 1770.664-1770.686                | 4831.2            | 0.11              |         |
|     |           | 37.46                |               | 1180.788 |          |          | 3540.348        |                  |          |          |               | 0.006             |                                  | 1180.776-1180.793 | 36164.4           | 0.82    |
| 13  |           | 36.42                |               |          |          | 1228.505 | 2456.002        | 819.338          | 1228.503 | 2455.998 | 0.004         | H3N4              | 1228.496-1228.510                | 10867.2           | 0.25              |         |
|     |           | 36.39                |               | 819.339  |          |          | 2456.001        |                  |          |          |               | 0.003             |                                  | 819.333-819.343   | 10508.6           | 0.24    |
| 14  |           | 36.14                |               |          |          | 1309.530 | 2618.052        |                  |          |          |               | 0.001             | H4N4                             | 1309.521-1309.537 | 4018.9            | 0.09    |
|     |           | 36.17                |               | 873.357  |          |          | 2618.055        | 873.356          | 1309.529 | 2618.051 | 0.004         | H4N4              | 873.351-873.361                  | 4084.3            | 0.09              |         |
| 15  |           | 30.47                |               |          |          | 1119.961 | 2238.914        | 746.976          | 1119.960 | 2238.913 | 0.001         | H3N3F1            | 1119.954-1119.968                | 11607.3           | 0.26              |         |
|     |           | 30.61                |               | 746.976  |          |          | 2238.912        |                  |          |          |               | -0.001            |                                  | 746.972-746.980   | 2219.9            | 0.05    |
| 16  |           | 30.15                |               |          |          | 1200.992 | 2400.976        | 800.994          | 1200.987 | 2400.966 | 0.010         | H4N3F1            | 1200.980-1200.994                | 4862.7            | 0.11              |         |
|     |           | 29.97                |               |          |          | 1221.502 | 2441.996        |                  |          |          |               | 0.003             |                                  | 1221.493-1221.507 | 55004.6           | 1.24    |
| 17  |           | a                    |               |          |          | 1221.502 | 2441.996        |                  |          |          |               | 0.003             | H3N4F1                           | 1221.493-1221.507 | 186334            | 4.21    |
|     |           | b                    |               |          |          | 1221.502 | 2441.996        | 814.670          | 1221.500 | 2441.993 | 0.001         | H3N4F1            |                                  | 44779.7           | 1.01              |         |
|     |           | a                    |               | 814.67   |          |          | 2441.994        |                  |          |          |               | 0.001             |                                  | 814.664-814.674   | 112349            | 2.54    |
|     |           | b                    |               | 814.670  |          |          | 2441.994        |                  |          |          |               | 0.001             |                                  |                   | 112349            | 2.54    |
| 18  |           | a                    |               |          |          | 1302.528 | 2604.048        |                  |          |          |               | 0.003             |                                  | 1302.519-1302.535 | 322589            | 7.29    |
|     |           | b                    |               |          |          | 1302.528 | 2604.048        | 868.687          | 1302.526 | 2604.045 | 0.003         | H4N4F1            |                                  | 249223            | 5.63              |         |
|     |           | a                    |               | 868.687  |          |          | 2604.045        |                  |          |          |               | 0.000             |                                  | 868.682-868.692   | 258274            | 5.84    |
|     | b         |                      | 868.688       |          |          | 2604.048 |                 |                  |          |          | 0.003         |                   |                                  | 229007            | 5.18              |         |
| 19  | a         |                      |               |          | 1323.041 | 2645.074 |                 |                  |          |          | 0.002         |                   | 1323.032-1323.048                | 2528.2            | 0.06              |         |
|     | b         |                      |               |          | 1323.040 | 2645.072 | 882.363         | 1323.040         | 2645.072 | 0.000    | H3N5F1        |                   | 3078.7                           | 0.07              |                   |         |
|     | a         |                      | 882.362       |          |          | 2645.070 |                 |                  |          |          | -0.002        |                   | 882.357-882.367                  | 5403.3            | 0.12              |         |
|     | b         |                      | 882.363       |          |          | 2645.073 |                 |                  |          |          | 0.001         |                   |                                  | 5913.5            | 0.13              |         |
| 20  | 31.08     |                      |               |          | 1354.531 | 2708.054 | 903.357         | 1354.532         | 2708.056 | -0.002   | H4N3F1G1      | 1354.524-1354.540 | 3171.2                           | 0.07              |                   |         |
|     | 31.14     |                      | 903.357       |          |          | 2708.055 |                 |                  |          |          | -0.001        |                   | 903.352-903.362                  | 2194.5            | 0.05              |         |
| 21  | a         |                      |               |          | 1383.555 | 2766.102 |                 |                  |          |          | 0.004         |                   | 1383.545-1383.561                | 79079.8           | 1.79              |         |
|     | b         |                      |               |          | 1383.555 | 2766.102 | 922.705         | 1383.553         | 2766.098 | 0.004    | H5N4F1        |                   | 50570.5                          | 1.14              |                   |         |
|     | a         |                      | 922.705       |          |          | 2766.099 |                 |                  |          |          | 0.001         |                   | 922.699-922.711                  | 80177.3           | 1.81              |         |
|     | b         |                      | 922.705       |          |          | 2766.099 |                 |                  |          |          | 0.001         |                   |                                  | 52592.5           | 1.19              |         |
| 22  |           |                      |               | 29.95    | 936.381  | 2807.127 | 936.380         | 1404.066         | 2807.125 | 0.002    | H4N5F1        | 936.374-936.386   | 3117.4                           | 0.07              |                   |         |
| 23  |           |                      |               | 30.29    | 957.372  | 2870.100 | 957.375         | 1435.558         | 2870.109 | -0.009   | H5N3F1G1      | 957.369-957.381   | 2837.8                           | 0.06              |                   |         |
| 24  | a         |                      |               |          | 1456.073 | 2911.138 |                 |                  |          |          | 0.002         |                   | 1456.063-1456.081                | 43446.1           | 0.98              |         |
|     | b         |                      |               |          | 1456.074 | 2911.140 | 971.051         | 1456.072         | 2911.136 | 0.004    | H4N4F1G1      |                   | 25337                            | 0.57              |                   |         |
|     | a         |                      | 971.052       |          |          | 2911.140 |                 |                  |          |          | 0.004         |                   | 971.044-971.056                  | 95136.7           | 2.15              |         |
|     | b         |                      | 971.051       |          |          | 2911.137 |                 |                  |          |          | 0.001         |                   |                                  | 43424.5           | 0.98              |         |
| 25  |           |                      |               | 29.37    | 1464.577 | 2928.146 | 976.722         | 1464.579         | 2928.151 | -0.005   | H6N4F1        | 1464.570-1461.588 | 1784.4                           | 0.04              |                   |         |
| 26  |           |                      |               | 29.31    | 976.723  | 2928.153 |                 |                  |          |          | 0.002         |                   | 976.716-976.728                  | 3209.2            | 0.07              |         |
| 27  | 30.15     |                      |               |          | 1537.102 | 3073.196 | 1025.068        | 1537.098         | 3073.188 | 0.008    | H5N4F1G1      | 1537.089-1537.107 | 47021.8                          | 1.06              |                   |         |
|     | 30.53     |                      |               |          | 1557.618 | 3114.228 | 1038.744        | 1557.611         | 3114.215 | 0.013    | H4N5F1G1      | 1557.602-1557.620 | 3142.6                           | 0.07              |                   |         |
| 28  |           |                      |               | 30.61    | 1690.642 | 3380.276 | 1127.432        | 1690.643         | 3380.279 | -0.003   | H5N4F1G2      | 1690.633-1690.653 | 10358                            | 0.23              |                   |         |
| 29  | 31.67     |                      |               |          | 1178.989 | 2356.970 |                 |                  |          |          | 0.004         |                   | 1178.980-1178.994                | 2192.9            | 0.05              |         |
|     | 31.79     |                      | 786.328       |          |          | 2356.968 | 786.327         | 1178.987         | 2356.966 | 0.002    | H3N3F1        | 786.322-786.332   | 13471.2                          | 0.30              |                   |         |
| 30  | 31.48     |                      |               |          | 1260.016 | 2519.024 | 840.345         | 1260.013         | 2519.019 | 0.005    | H4N3F1        | 1260.005-1230.021 | 4439.7                           | 0.10              |                   |         |
|     | 31.64     |                      |               |          | 1280.529 | 2560.050 | 854.021         | 1280.527         | 2560.046 | 0.004    | H3N4F1        | 1280.519-1280.535 | 157569                           | 3.56              |                   |         |
| 31  | 31.61     |                      | 854.021       |          |          | 2560.047 |                 |                  |          |          | 0.001         |                   | 854.015-854.025                  | 153216            | 3.46              |         |
|     | 31.45     |                      |               |          | 1361.555 | 2722.102 | 908.038         | 1361.553         | 2722.098 | 0.004    | H4N4F1        | 1361.545-1361.561 | 109155                           | 2.47              |                   |         |
| 32  | 31.42     |                      | 908.039       |          |          | 2722.101 |                 |                  |          |          | 0.003         |                   | 908.033-908.043                  | 79807             | 1.80              |         |
|     | 31.39     |                      |               |          | 1442.581 | 2884.154 | 962.056         | 1442.579         | 2884.151 | 0.003    | H5N4F1        | 1442.571-1442.589 | 36083.6                          | 0.82              |                   |         |
| 33  | 31.36     |                      | 962.057       |          |          | 2884.155 |                 |                  |          |          | 0.004         |                   | 962.050-962.062                  | 17540.9           | 0.40              |         |
|     | 32.39     |                      |               |          | 1515.104 | 3029.200 | 1010.402        | 1515.098         | 3029.189 | 0.011    | H4N4F1G1      | 1515.089-1515.107 | 28975.5                          | 0.65              |                   |         |
| 34  | 32.36     |                      | 1010.403      |          |          | 3029.193 |                 |                  |          |          | 0.004         |                   | 1010.395-1010.407                | 7252              | 0.16              |         |
|     | 32.19     |                      |               |          | 1596.130 | 3191.252 | 1064.419        | 1596.125         | 3191.242 | 0.010    | H5N4F1G1      | 1596.115-1596.135 | 23990.1                          | 0.54              |                   |         |
| 35  | 32.19     |                      | 1064.420      |          |          | 3191.244 |                 |                  |          |          | 0.002         |                   | 1064.413-1064.425                | 8224.4            | 0.19              |         |
|     | 32.88     |                      | 1166.786      |          |          | 3498.342 | 1166.783        | 1749.670         | 3498.332 | 0.010    | H5N4F1G2      | 1166.775-1166.789 | 6059.5                           | 0.14              |                   |         |
|     |           |                      |               |          |          |          |                 |                  |          |          |               | total             | 4425066                          | 100.00            |                   |         |

| No. | peptide | Retention time (min) | observed mass |      |          |          | calculated mass | thoretical mass |          |          | $\Delta$ mass | Structure | mass range for EIC ( $\pm$ 6ppm) | Intensity | relative |
|-----|---------|----------------------|---------------|------|----------|----------|-----------------|-----------------|----------|----------|---------------|-----------|----------------------------------|-----------|----------|
|     |         |                      | M+4H          | M+3H | M+2H     | M+H      |                 | M+3H            | M+2H     | M+H      |               |           |                                  |           |          |
| 1   |         | 36.25                |               |      | 1199.993 | 2398.978 |                 | 800.331         | 1199.992 | 2398.977 | 0.001         | H3N3F1    | 1199.985-1199.999                | 3150.6    | 0.19     |
|     |         | 36.30                | 800.33        |      |          | 2398.974 |                 |                 |          |          | -0.003        |           | 800.326-800.336                  | 10969.3   | 0.66     |
| 2   |         | 36.04                |               |      | 1281.018 | 2561.028 |                 | 854.349         | 1281.019 | 2561.030 | -0.002        | H4N3F1    | 1281.011-1281.027                | 3632.4    | 0.22     |
|     |         | 36.19                |               |      | 1301.534 | 2602.060 |                 |                 |          |          | 0.004         |           | 1301.524-1301.540                | 109389.4  | 6.62     |
| 3   |         | 36.16                | 868.025       |      |          | 2602.059 |                 | 868.024         | 1301.532 | 2602.056 | 0.003         | H3N4F1    | 868.019-868.029                  | 97861.5   | 5.93     |
|     |         | 35.98                |               |      | 1382.56  | 2764.112 |                 |                 |          |          | 0.003         |           | 1382.550-1382.566                | 69817.3   | 4.23     |
| 4   |         | 35.95                | 922.042       |      |          | 2764.110 |                 | 922.042         | 1382.558 | 2764.109 | 0.001         | H4N4F1    | 922.036-922.048                  | 39721.3   | 2.41     |
|     |         | 36.30                | 935.72        |      |          | 2805.144 |                 | 935.717         | 1403.071 | 2805.135 | 0.009         | H3N5F1    | 935.711-935.723                  | 2949.4    | 0.18     |
| 5   |         | 35.86                |               |      | 1463.587 | 2926.166 |                 |                 |          |          | 0.004         |           | 1463.576-1463.594                | 21632     | 1.31     |
|     |         | 35.83                | 976.06        |      |          | 2926.164 |                 | 976.059         | 1463.585 | 2926.162 | 0.002         | H5N4F1    | 976.053-976.065                  | 6840.9    | 0.41     |
| 6   |         | 36.01                | 989.738       |      |          | 2967.198 |                 | 989.735         | 1484.098 | 2967.188 | 0.010         | H4N5F1    | 989.729-989.741                  | 1360.7    | 0.08     |
|     |         | 36.95                |               |      | 1536.107 | 3071.206 |                 |                 |          |          | 0.007         |           | 1536.095-1536.113                | 48349.7   | 2.93     |
| 7   |         | 36.95                | 1024.406      |      |          | 3071.202 |                 | 1024.405        | 1536.103 | 3071.199 | 0.003         | H4N4F1G1  | 1024.399-1024.411                | 7990.2    | 0.48     |
|     |         | 36.77                |               |      | 1617.135 | 3233.262 |                 |                 |          |          | 0.010         |           | 1617.120-1617.140                | 29026.7   | 1.76     |
| 8   |         | 36.71                | 1078.423      |      |          | 3233.253 |                 | 1078.423        | 1617.130 | 3233.252 | 0.001         | H5N4F1G1  | 1078.417-1078.429                | 5825.5    | 0.35     |
|     |         | 37.55                | 1180.787      |      |          | 3540.345 |                 | 1180.786        | 1770.675 | 3540.342 | 0.003         | H5N4F1G2  | 1180.779-1180.793                | 10414.7   | 0.63     |
| 9   |         | 36.62                |               |      | 1228.504 | 2456.000 |                 | 819.338         | 1228.503 | 2455.998 | 0.002         | H3N4      | 128.496-1228.510                 | 5779.5    | 0.35     |
|     |         | 36.28                |               |      | 1309.532 | 2618.056 |                 |                 |          |          | 0.005         |           | 1309.521-1309.537                | 2313.9    | 0.14     |
| 10  |         | 36.39                | 873.356       |      |          | 2618.052 |                 | 873.356         | 1309.529 | 2618.051 | 0.001         | H4N4      | 873.351-873.361                  | 2354.5    | 0.14     |
|     |         | 37.38                | 975.719       |      |          | 2925.141 |                 | 975.719         | 1463.074 | 2925.141 | 0.000         | H4N4G1    | 975.713-975.725                  | 1339.8    | 0.08     |
| 14  | a       | 30.07                |               |      | 1119.961 | 2238.914 |                 |                 |          |          | 0.001         |           |                                  | 3083.6    | 0.19     |
|     | b       | 30.62                |               |      | 1119.963 | 2238.918 |                 | 746.976         | 1119.960 | 2238.913 | 0.005         | H3N3F1    | 1119.954-1119.968                | 1951      | 0.12     |
|     | a       | 30.65                | 746.975       |      |          | 2238.909 |                 |                 |          |          | -0.004        |           | 746.972-746.980                  | 1455.3    | 0.09     |
|     | b       | 30.77                | 746.977       |      |          | 2238.915 |                 |                 |          |          | 0.002         |           |                                  | 5996.8    | 0.36     |
| 15  |         | 30.30                |               |      | 1200.990 | 2400.972 |                 | 800.994         | 1200.987 | 2400.966 | 0.006         | H4N3F1    | 1200.980-1200.994                | 1319.6    | 0.08     |
|     |         | 30.56                | 800.995       |      |          | 2400.969 |                 |                 |          |          | 0.003         |           | 800.989-800.999                  | 4016.4    | 0.24     |
| 16  | a       | 29.98                |               |      | 1221.501 | 2441.994 |                 |                 |          |          | 0.001         |           |                                  | 27368.7   | 1.66     |
|     | b       | 30.56                |               |      | 1221.502 | 2441.996 |                 | 814.670         | 1221.500 | 2441.993 | 0.003         | H3N4F1    | 1221.493-1221.507                | 86307.4   | 5.23     |
|     | a       | 29.98                | 814.67        |      |          | 2441.994 |                 |                 |          |          | 0.001         |           | 814.664-814.674                  | 31505     | 1.91     |
|     | b       | 30.56                | 814.67        |      |          | 2441.994 |                 |                 |          |          | 0.001         |           |                                  | 67404.2   | 4.08     |
| 17  | a       | 29.62                |               |      | 1302.528 | 2604.048 |                 |                 |          |          | 0.003         |           |                                  | 39977.7   | 2.42     |
|     | b       | 30.33                |               |      | 1302.528 | 2604.048 |                 |                 |          |          | 0.003         |           | 1302.519-1302.535                | 124628.3  | 7.55     |
|     | a       | 29.73                | 868.688       |      |          | 2604.048 |                 | 868.687         | 1302.526 | 2604.045 | 0.003         | H4N4F1    |                                  | 14949.1   | 0.91     |
|     | b       | 30.33                | 868.688       |      |          | 2604.048 |                 |                 |          |          | 0.003         |           | 868.682-868.692                  | 155976.7  | 9.45     |
| 18  |         | 31.03                | 903.358       |      |          | 2708.058 |                 | 903.380         | 1354.566 | 2708.125 | -0.067        | H4N3F1G1  | 903.352-903.362                  | 1162.7    | 0.07     |
|     |         | 29.59                |               |      | 1383.555 | 2766.102 |                 |                 |          |          | 0.004         |           | 1383.545-1383.561                | 10024.8   | 0.61     |
| 19  | a       | 30.24                |               |      | 1383.556 | 2766.104 |                 |                 |          |          | 0.006         |           |                                  | 22174.5   | 1.34     |
|     | b       | 29.56                | 922.705       |      |          | 2766.099 |                 | 922.705         | 1383.553 | 2766.098 | 0.001         | H5N4F1    |                                  | 8307.9    | 0.50     |
|     | a       | 30.17                | 922.705       |      |          | 2766.099 |                 |                 |          |          | 0.001         |           | 922.699-922.711                  | 26694.3   | 1.62     |
|     | b       | 30.39                |               |      | 1456.074 | 2911.140 |                 |                 |          |          | 0.004         |           | 1456.063-1456.081                | 11485     | 0.70     |
| 20  | a       | 30.70                |               |      | 1456.074 | 2911.140 |                 |                 |          |          | 0.004         |           |                                  | 10063.1   | 0.61     |
|     | b       | 30.33                | 971.051       |      |          | 2911.137 |                 | 971.051         | 1456.072 | 2911.136 | 0.001         | H4N4F1G1  |                                  | 31423.1   | 1.90     |
|     | a       | 30.97                | 971.051       |      |          | 2911.137 |                 |                 |          |          | 0.001         |           | 971.044-971.056                  | 20923     | 1.27     |
|     | b       | 30.24                |               |      | 1537.100 | 3073.192 |                 |                 |          |          | 0.004         |           | 1537.089-1537.107                | 16135.4   | 0.98     |
| 21  | a       | 30.77                |               |      | 1537.1   | 3073.192 |                 |                 |          |          | 0.004         |           |                                  | 10719     | 0.65     |
|     | b       | 30.24                | 1025.069      |      |          | 3073.191 |                 | 1025.068        | 1537.098 | 3073.188 | 0.003         | H5N4F1G1  |                                  | 65645.6   | 3.98     |
|     | a       | 30.80                | 1025.069      |      |          | 3073.191 |                 |                 |          |          | 0.003         |           | 1025.062-1025.074                | 45537.1   | 2.76     |
|     | b       | 30.59                |               |      | 1690.648 | 3380.288 |                 |                 |          |          | 0.009         |           |                                  | 2930.3    | 0.18     |
| 22  | a       | 31.24                |               |      | 1690.641 | 3380.274 |                 |                 |          |          | -0.005        |           | 1690.633-1690.653                | 3103.9    | 0.19     |
|     | b       | 30.65                | 1127.433      |      |          | 3380.283 |                 | 1127.432        | 1690.643 | 3380.279 | 0.004         | H5N4F1G2  |                                  | 16771.7   | 1.02     |
|     | a       | 31.21                | 1127.432      |      |          | 3380.280 |                 |                 |          |          | 0.001         |           | 1127.424-1127.438                | 11104.2   | 0.67     |
|     | b       | 31.83                |               |      | 1178.989 | 2356.970 |                 |                 |          |          | 0.004         |           | 1178.981-1178.994                | 1543.2    | 0.09     |
| 23  |         | 31.89                | 786.328       |      |          | 2356.968 |                 | 786.327         | 1178.987 | 2356.966 | 0.002         | H3N3F1    | 786.322-786.332                  | 6371.9    | 0.39     |
|     |         | 31.58                |               |      | 1260.02  | 2519.032 |                 | 840.345         | 1260.013 | 2519.019 | 0.013         | H4N3F1    | 1260.005-1260.021                | 2374.3    | 0.14     |
| 24  |         | 31.76                |               |      | 1280.528 | 2560.048 |                 |                 |          |          | 0.002         |           | 1280.519-1280.535                | 60041.8   | 3.64     |
|     |         | 31.76                | 854.021       |      |          | 2560.047 |                 | 854.021         | 1280.527 | 2560.046 | 0.001         | H3N4F1    | 854.015-854.025                  | 52120.7   | 3.16     |
| 25  |         | 31.61                |               |      | 1361.555 | 2722.102 |                 |                 |          |          | 0.004         |           | 1361.545-1361.561                | 66786.7   | 4.04     |
|     |         | 31.55                | 908.039       |      |          | 2722.101 |                 | 908.038         | 1361.553 | 2722.098 | 0.003         | H4N4F1    | 908.033-908.043                  | 34249.1   | 2.07     |
| 26  |         | 32.65                | 942.709       |      |          | 2826.111 |                 | 942.708         | 1413.558 | 2826.109 | 0.002         | H4N3F1G1  | 942.702-942.714                  | 2165.3    | 0.13     |
|     |         | 31.48                |               |      | 1442.583 | 2884.158 |                 | 962.056         | 1442.579 | 2884.151 | 0.007         | H5N4F1    | 1442.571-1442.589                | 17440.9   | 1.06     |
| 27  |         | 31.52                | 962.056       |      |          | 2884.152 |                 |                 |          |          | 0.001         |           | 962.050-962.062                  | 10193     | 0.62     |
|     |         | 32.44                |               |      | 1515.102 | 3029.196 |                 |                 |          |          | 0.007         |           | 1515.089-1515.107                | 22260.8   | 1.35     |
| 28  |         | 32.47                | 1010.403      |      |          | 3029.193 |                 | 1010.402        | 1515.098 | 3029.189 | 0.004         | H4N4F1G1  | 1010.395-1010.407                | 6125.4    | 0.37     |
|     |         | 32.26                |               |      | 1596.13  | 3191.252 |                 | 1064.419        | 1596.125 | 3191.242 | 0.010         | H5N4F1G1  | 1596.115-1596.135                | 3103      | 0.19     |
| 29  |         | 32.18                |               |      | 1207.498 | 2413.988 |                 |                 |          |          | 0.000         |           | 1207.491-1207.505                | 1971      | 0.12     |
|     |         | 32.11                | 805.335       |      |          | 2413.989 |                 | 805.335         | 1207.498 | 2413.988 | 0.001         | H3N4      | 805.329-805.339                  | 2207.7    | 0.13     |
| 30  |         | 31.86                | 859.352       |      |          | 2576.040 |                 | 859.352         | 1288.524 | 2576.041 | -0.001        | H4N4      | 859.347-859.357                  | 1575.3    | 0.10     |
|     |         |                      |               |      |          |          |                 |                 |          |          |               |           | total                            | 1651394.8 | 100      |

LC-MS analysis of N-glycans on IgGs obtained from *Fut8*<sup>-/-</sup> mice before treatment with 0.4 mg/g/day L-fucose\_0<sup>th</sup> day (B-0).

| No. | peptide   | Retention time (min) | observed mass |          |          | calculated mass |          | theoretical mass |          |          | $\Delta$ -mass    | Structure         | mass range for EIC ( $\pm$ 6ppm) | Intensity | relative |
|-----|-----------|----------------------|---------------|----------|----------|-----------------|----------|------------------|----------|----------|-------------------|-------------------|----------------------------------|-----------|----------|
|     |           |                      | M+4H          | M+3H     | M+2H     | M+H             | M+3H     | M+2H             | M+H      |          |                   |                   |                                  |           |          |
| 1   | EEQFNSTFR | 36.07                |               | 1199.993 | 2398.978 |                 | 800.331  | 1199.992         | 2398.977 | 0.001    | H3N3F1            | 1199.985-1199.999 | 12094.9                          | 0.37      |          |
|     |           | 36.24                | 800.331       |          | 2398.977 |                 |          |                  |          | 0.000    |                   | 800.326-800.336   | 3898                             | 0.12      |          |
|     |           | 35.75                |               | 1281.019 | 2561.030 | 854.349         | 1281.019 | 2561.030         | 0.000    | H4N3F1   | 1281.011-1281.027 | 5519.9            | 0.17                             |           |          |
| 3   | EEQFNSTFR | 36.04                |               | 1301.533 | 2602.058 |                 | 868.024  | 1301.532         | 2602.056 | 0.002    | H3N4F1            | 1301.524-1301.540 | 188623.7                         | 5.81      |          |
|     |           | 36.07                | 868.025       |          | 2602.059 |                 |          |                  |          | 0.003    |                   | 868.019-868.029   | 171123.7                         | 5.27      |          |
| 4   | EEQFNSTFR | 35.78                |               | 1382.560 | 2764.112 |                 | 922.042  | 1382.558         | 2764.109 | 0.003    | H4N4F1            | 1382.550-1382.566 | 84264.1                          | 2.60      |          |
|     |           | 35.84                | 922.043       |          | 2764.113 |                 |          |                  |          | 0.004    |                   | 922.036-922.048   | 112879.1                         | 3.48      |          |
| 5   | EEQFNSTFR | 36.07                |               | 935.720  | 2805.144 |                 | 935.717  | 1403.071         | 2805.135 | 0.009    | H3N5F1            | 935.711-935.723   | 2811                             | 0.09      |          |
|     |           | 35.72                |               | 1463.586 | 2926.164 |                 | 976.059  | 1463.585         | 2926.162 | 0.002    | H5N4F1            | 1463.576-1463.594 | 14657.2                          | 0.45      |          |
| 6   | EEQFNSTFR | 35.75                |               | 976.060  | 2926.164 |                 |          |                  |          | 0.002    |                   | 976.053-976.065   | 28692.2                          | 0.88      |          |
|     |           | 36.96                |               | 1536.106 | 3071.204 |                 | 1024.405 | 1536.103         | 3071.199 | 0.005    | H4N4F1G           | 1536.095-1536.113 | 28188.3                          | 0.87      |          |
| 7   | EEQFNSTFR | 36.96                | 1024.406      |          | 3071.202 |                 | 1024.405 | 1536.103         | 3071.199 | 0.003    | H4N4F1G           | 1024.399-1024.411 | 82136.3                          | 2.53      |          |
|     |           | 37.16                | 1030.072      |          | 3088.200 | 1030.077        | 1544.611 | 3088.215         | -0.015   | H6N4F1   | 1030.071-1030.083 | 2777.4            | 0.09                             |           |          |
| 9   | EEQFNSTFR | 36.63                |               | 1617.132 | 3233.256 |                 | 1078.423 | 1617.130         | 3233.252 | 0.004    | H5N4F1G           | 1617.120-1617.140 | 13644.7                          | 0.42      |          |
|     |           | 36.66                | 1078.424      |          | 3233.256 |                 |          |                  |          | 0.004    |                   | 1078.417-1078.429 | 63196.6                          | 1.95      |          |
| 10  | EEQFNSTFR | 37.56                | 1180.788      |          | 3540.348 | 1180.786        | 1770.675 | 3540.342         | 0.006    | H5N4F1G2 | 1180.779-1180.793 | 26275.6           | 0.81                             |           |          |
|     |           | 36.43                |               | 1228.504 | 2456.000 | 819.338         | 1228.503 | 2455.998         | 0.002    | H3N4     | 1228.496-1228.510 | 5582.3            | 0.17                             |           |          |
| 11  | EEQFNSTFR | 36.32                |               | 1309.530 | 2618.046 |                 | 873.356  | 1309.529         | 2618.051 | 0.001    | H4N4              | 1309.521-1309.537 | 5430.4                           | 0.17      |          |
|     |           | 36.12                | 873.354       |          | 2618.046 |                 |          |                  |          | -0.005   |                   | 873.351-873.361   | 2456.4                           | 0.08      |          |
| 13  | EEQFNSTFR | 37.39                | 975.719       |          | 2925.141 | 975.719         | 1463.074 | 2925.141         | 0.000    | H4N4G1   | 975.713-975.725   | 2516.4            | 0.08                             |           |          |
|     |           | 29.92                |               | 1119.961 | 2238.914 |                 | 746.976  | 1119.960         | 2238.913 | 0.001    | H3N3F1            | 1119.954-1119.968 | 5156.2                           | 0.16      |          |
| 14  | EEQFNSTFR | 30.55                |               | 1119.963 | 2238.918 |                 |          |                  |          | 0.005    |                   |                   | 9782.7                           | 0.30      |          |
|     |           | 30.18                |               | 1200.990 | 2400.972 |                 | 800.994  | 1200.987         | 2400.966 | 0.006    | H4N3F1            | 1200.980-1200.994 | 1553                             | 0.05      |          |
| 15  | EEQFNSTFR | 30.44                | 800.994       |          | 2400.966 |                 |          |                  |          | 0.000    |                   | 800.989-800.999   | 6491.5                           | 0.20      |          |
|     |           | 29.86                |               | 1221.501 | 2441.994 |                 |          |                  |          | 0.001    |                   |                   | 47827.3                          | 1.47      |          |
| 16  | EEQFNSTFR | 30.38                |               | 1221.502 | 2441.996 |                 | 814.670  | 1221.500         | 2441.993 | 0.003    | H3N4F1            | 1221.493-1221.507 | 184914.5                         | 5.70      |          |
|     |           | 29.80                | 814.669       |          | 2441.991 |                 |          |                  |          | -0.002   |                   |                   | 49110.4                          | 1.51      |          |
| 17  | EEQFNSTFR | 30.38                | 814.670       |          | 2441.994 |                 |          |                  |          | 0.001    |                   | 814.664-814.674   | 127808.2                         | 3.94      |          |
|     |           | 29.56                |               | 1302.527 | 2604.046 |                 |          |                  |          | 0.001    |                   | 1302.519-1302.535 | 43803.6                          | 1.35      |          |
| 17  | EEQFNSTFR | 30.14                |               | 1302.529 | 2604.050 |                 | 868.687  | 1302.526         | 2604.045 | 0.005    | H4N4F1            |                   | 259487.6                         | 7.99      |          |
|     |           | 29.56                | 868.688       |          | 2604.048 |                 |          |                  |          | 0.003    |                   | 868.682-868.692   | 26838.6                          | 0.83      |          |
| 18  | EEQFNSTFR | 30.14                | 868.688       |          | 2604.048 |                 |          |                  |          | 0.003    |                   |                   | 254065                           | 7.82      |          |
|     |           | 30.72                | 882.364       |          | 2645.076 | 882.363         | 1323.040 | 2645.072         | 0.004    | H3N5F1   | 882.357-882.367   | 2268.6            | 0.07                             |           |          |
| 19  | EEQFNSTFR | 31.15                | 903.360       |          | 2708.064 | 903.360         | 1354.566 | 2708.125         | -0.061   | H4N3F1G  | 1903.352-903.362  | 2132.3            | 0.07                             |           |          |
|     |           | 29.48                |               | 1383.552 | 2766.096 |                 | 922.705  | 1383.553         | 2766.098 | -0.002   | H5N4F1            | 1383.545-1383.561 | 23857.8                          | 0.73      |          |
| 20  | EDYNSTLR  | 30.05                |               | 1383.552 | 2766.096 |                 |          |                  |          | -0.002   |                   |                   | 39446.8                          | 1.21      |          |
|     |           | 29.39                | 922.705       |          | 2766.099 |                 |          |                  |          | 0.001    |                   | 922.699-922.711   | 19516.2                          | 0.60      |          |
| 20  | EDYNSTLR  | 30.05                | 922.705       |          | 2766.099 |                 |          |                  |          | 0.001    |                   |                   | 45670.3                          | 1.41      |          |
|     |           | 30.21                |               | 1456.074 | 2911.140 |                 |          |                  |          | 0.004    |                   | 1456.063-1456.081 | 24724.4                          | 0.76      |          |
| 21  | EDYNSTLR  | 30.77                |               | 1456.074 | 2911.140 |                 | 971.051  | 1456.072         | 2911.136 | 0.004    | H4N4F1G           |                   | 22604.6                          | 0.70      |          |
|     |           | 30.21                | 971.051       |          | 2911.137 |                 |          |                  |          | 0.001    |                   | 971.044-971.056   | 57719.6                          | 1.78      |          |
| 21  | EDYNSTLR  | 30.86                |               | 971.051  | 2911.137 |                 |          |                  |          | 0.001    |                   |                   | 40396.1                          | 1.24      |          |
|     |           | 29.33                | 976.722       |          | 2928.150 | 976.722         | 1464.579 | 2928.151         | -0.001   | H6N4F1   | 976.716-976.728   | 2224.6            | 0.07                             |           |          |
| 23  | EAQYNSTFR | 30.11                |               | 1537.102 | 3073.196 |                 |          |                  |          | 0.008    |                   | 1537.602-1537.107 | 35324.6                          | 1.09      |          |
|     |           | 30.66                |               | 1537.101 | 3073.194 |                 | 1025.068 | 1537.098         | 3073.188 | 0.006    | H5N4F1G           |                   | 23827.5                          | 0.73      |          |
| 23  | EAQYNSTFR | 30.08                | 1025.069      |          | 3073.191 |                 |          |                  |          | 0.003    |                   | 1025.062-1025.074 | 111328.7                         | 3.43      |          |
|     |           | 30.63                | 1025.069      |          | 3073.191 |                 |          |                  |          | 0.003    |                   |                   | 67805.4                          | 2.09      |          |
| 24  | EAQYNSTFR | 29.92                |               | 1618.130 | 3235.252 | 1079.086        | 1618.124 | 3235.241         | 0.011    | H6N4F1G  | 1617.486-1619.860 | 3670.5            | 0.11                             |           |          |
|     |           | 30.58                |               | 1690.651 | 3380.294 |                 |          |                  |          | 0.015    |                   | 1690.633-1690.653 | 6421.7                           | 0.20      |          |
| 25  | EAQYNSTFR | 31.18                |               | 1690.642 | 3380.276 |                 |          |                  |          | -0.003   |                   |                   | 3009.6                           | 0.09      |          |
|     |           | 30.55                | 1127.433      |          | 3380.283 | 1127.432        | 1690.643 | 3380.279         | 0.004    | H5N4F1G2 |                   | 1127.424-1127.438 | 32069.8                          | 0.99      |          |
| 25  | EAQYNSTFR | 31.15                | 1127.433      |          | 3380.283 |                 |          |                  |          | 0.004    |                   |                   | 18033.4                          | 0.56      |          |
|     |           | 31.67                |               | 1178.988 | 2356.968 | 786.327         | 1178.987 | 2356.966         | 0.002    | H3N3F1   | 1178.980-1178.994 | 12930.4           | 0.40                             |           |          |
| 26  | EAQYNSTFR | 31.71                | 786.328       |          | 2356.968 |                 |          |                  |          | 0.002    |                   | 786.322-786.332   | 4554.6                           | 0.14      |          |
|     |           | 31.40                |               | 1260.018 | 2519.028 | 840.345         | 1260.013 | 2519.019         | 0.009    | H3N3F1   | 1260.005-1260.021 | 7559.2            | 0.23                             |           |          |
| 27  | EAQYNSTFR | 31.49                | 840.347       |          | 2519.025 |                 |          |                  |          | 0.006    |                   | 840.340-840.350   | 1566.9                           | 0.05      |          |
|     |           | 31.65                |               | 1280.528 | 2560.048 | 854.021         | 1280.527 | 2560.046         | 0.002    | H3N4F1   | 1280.519-1280.535 | 158008.9          | 4.87                             |           |          |
| 28  | EAQYNSTFR | 31.62                | 854.021       |          | 2560.047 |                 |          |                  |          | 0.001    |                   | 854.015-854.025   | 161587.7                         | 4.98      |          |
|     |           | 31.46                |               | 1361.555 | 2722.102 | 908.038         | 1361.553 | 2722.098         | 0.004    | H4N4F1   | 1361.545-1361.561 | 112377.8          | 3.46                             |           |          |
| 29  | EAQYNSTFR | 31.43                | 908.039       |          | 2722.101 |                 |          |                  |          | 0.003    |                   | 908.033-908.043   | 134055.9                         | 4.13      |          |
|     |           | 32.46                | 942.704       |          | 2826.096 | 942.708         | 1413.558 | 2826.109         | -0.013   | H4N3F1G  | 942.702-942.714   | 1376.2            | 0.04                             |           |          |
| 30  | EAQYNSTFR | 31.34                |               | 1442.582 | 2884.156 | 962.056         | 1442.579 | 2884.151         | 0.005    | H5N4F1   | 1442.571-1442.589 | 23954.6           | 0.74                             |           |          |
|     |           | 31.34                | 962.057       |          | 2884.155 |                 |          |                  |          | 0.004    |                   | 962.050-962.062   | 39923.1                          | 1.23      |          |
| 32  | EAQYNSTFR | 32.28                |               | 1515.102 | 3029.196 | 1010.402        | 1515.098 | 3029.189         | 0.007    | H4N4F1G  | 1515.089-1515.107 | 12538.9           | 0.39                             |           |          |
|     |           | 32.34                | 1010.402      |          | 3029.190 |                 |          |                  |          | 0.001    |                   | 1010.395-1010.407 | 42399.5                          | 1.31      |          |
| 33  | EAQYNSTFR | 32.13                |               | 1596.127 | 3191.246 | 1064.419        | 1596.125 | 3191.242         | 0.004    | H5N4F1G  | 1596.115-1596.135 | 9895.5            | 0.30                             |           |          |
|     |           | 32.16                | 1064.420      |          | 3191.244 |                 |          |                  |          | 0.002    |                   | 1064.413-1064.425 | 40928.7                          | 1.26      |          |
| 34  | EAQYNSTFR | 32.77                |               | 1749.671 | 3498.334 | 1166.783        | 1749.670 | 3498.332         | 0.002    | H5N4F1G2 | 1749.660-1749.680 | 4643.5            | 0.14                             |           |          |
|     |           | 32.83                | 1166.785      |          | 3498.339 |                 |          |                  |          | 0.007    |                   | 1166.775-1166.789 | 11413                            | 0.35      |          |
| 35  | EAQYNSTFR | 32.05                |               | 1207.500 | 2413.992 | 805.335         | 1207.498 | 2413.988         | 0.004    | H3N4     | 1207.491-1207.505 | 2911.3            | 0.09                             |           |          |
|     |           | 31.99                | 805.336       |          | 2413.992 |                 |          |                  |          | 0.004    |                   | 805.329-805.339   | 3552.6                           | 0.11      |          |
| 36  | EAQYNSTFR | 31.74                |               | 1288.527 | 2576.046 | 859.352         | 1288.524 | 2576.041         | 0.005    | H4N4     | 1288.516-1288.532 | 1928.4            | 0.06                             |           |          |
|     |           | 31.71                | 859.351       |          | 2576.037 |                 |          |                  |          | -0.004   |                   | 859.347-859.357   | 3119.6                           | 0.10      |          |
|     |           |                      |               |          |          |                 |          |                  |          |          | total             | 3246885.6         | 100                              |           |          |

| No. | peptide   | Retention time (min) | observed mass |          |          | calculated mass | theoretical mass |          |          | $\Delta$ mass | Structure | mass range for EIC (+ 6ppm) | Intensity         | relative          |        |
|-----|-----------|----------------------|---------------|----------|----------|-----------------|------------------|----------|----------|---------------|-----------|-----------------------------|-------------------|-------------------|--------|
|     |           |                      | M+4H          | M+3H     | M+2H     | M+H             | M+3H             | M+2H     | M+H      |               |           |                             |                   |                   |        |
| 1   | EEQFNSTFR | 36.09                |               |          | 1118.970 | 2236.932        | 746.313          | 1118.966 | 2236.924 | 0.008         | H2N3F1    | 1118.959-1118.973           | 5098.9            | 0.11              |        |
| 2   |           | 36.09                |               |          | 1199.993 | 2398.978        |                  |          |          | 0.001         | H3N3F1    | 1199.985-1199.999           | 17250.2           | 0.38              |        |
|     |           | 36.15                | 800.331       |          |          | 2398.977        |                  | 800.331  | 1199.992 | 2398.977      | 0.000     |                             | 800.326-800.336   | 3060.8            | 0.07   |
| 3   |           | 35.79                |               |          | 1281.018 | 2561.028        |                  | 854.349  | 1281.019 | 2561.030      | -0.002    | H4N3F1                      | 1281.011-1281.027 | 5673.7            | 0.12   |
|     |           | 36.09                |               |          | 1301.534 | 2602.060        |                  |          |          |               | 0.004     |                             | 1301.524-1301.540 | 252844            | 5.54   |
| 4   |           | 36.06                |               | 868.025  |          | 2602.059        |                  | 868.024  | 1301.532 | 2602.056      | 0.003     | H3N4F1                      | 868.019-868.029   | 241847            | 5.30   |
|     |           | 35.79                |               |          | 1382.560 | 2764.112        |                  |          | 922.042  | 1382.558      | 2764.109  | 0.003                       | H4N4F1            | 1382.550-1382.566 | 119347 |
| 5   |           | 35.85                |               | 922.043  |          | 2764.113        |                  |          |          |               | 0.004     |                             | 922.0366-922.048  | 139839            | 3.06   |
|     |           | 36.15                |               | 935.715  |          | 2805.129        |                  | 935.717  | 1403.071 | 2805.135      | -0.006    | H3N5F1                      | 935.711-935.723   | 2741.6            | 0.06   |
| 6   |           | 35.64                |               |          | 1463.586 | 2926.164        |                  | 976.059  | 1463.585 | 2926.162      | 0.002     | H5N4F1                      | 1463.576-1463.594 | 24612.2           | 0.54   |
|     |           | 35.73                |               | 976.060  |          | 2926.164        |                  |          |          |               | 0.002     |                             | 976.053-976.065   | 35924.3           | 0.79   |
| 7   |           | 36.92                |               |          | 1536.105 | 3071.202        |                  | 1024.405 | 1536.103 | 3071.199      | 0.003     | H4N4F1G1                    | 1536.095-1536.113 | 32146.6           | 0.70   |
|     |           | 36.95                |               | 1024.406 |          | 3071.202        |                  |          |          |               | 0.003     |                             | 1024.399-1024.411 | 113396            | 2.48   |
| 8   |           | 37.07                |               | 1030.074 |          | 3088.206        |                  | 1030.077 | 1544.611 | 3088.215      | -0.009    | H6N4F1                      | 1030.071-1030.083 | 3070.7            | 0.07   |
|     |           | 36.75                |               |          | 1617.134 | 3233.260        |                  | 1078.423 | 1617.130 | 3233.252      | 0.008     | H5N4F1G1                    | 1617.120-1617.140 | 19762             | 0.43   |
| 9   |           | 36.69                |               | 1078.424 |          | 3233.256        |                  |          |          |               | 0.004     |                             | 1078.417-1078.429 | 71770.3           | 1.57   |
|     |           | 37.54                |               | 1180.788 |          | 3540.348        |                  | 1180.786 | 1770.675 | 3540.342      | 0.006     | H5N4F1G2                    | 1180.779-1180.793 | 34626.6           | 0.76   |
| 10  |           | 36.35                |               |          | 1228.504 | 2456.000        |                  | 819.338  | 1228.503 | 2455.998      | 0.002     | H3N4                        | 1228.496-1228.510 | 10668.8           | 0.23   |
|     |           | 36.15                |               |          | 1309.530 | 2618.052        |                  |          |          |               | 0.001     |                             | 1309.521-1309.537 | 6465.9            | 0.14   |
| 11  |           | 36.09                |               | 873.356  |          | 2618.052        |                  | 873.356  | 1309.529 | 2618.051      | 0.001     | H4N4                        | 873.351-873.361   | 7289.9            | 0.16   |
|     |           | 29.92                |               |          | 1119.960 | 2238.912        |                  |          |          |               | -0.001    |                             | 1119.954-1119.968 | 28987.3           | 0.64   |
| 12  |           | a                    | 30.45         |          | 1119.963 | 2238.918        |                  | 746.976  | 1119.960 | 2238.913      | 0.005     | H3N3F1                      | 1119.954-1119.968 | 15788.4           | 0.35   |
|     |           | b                    | 30.50         | 746.976  |          | 2238.912        |                  |          |          |               | -0.001    |                             | 746.972-746.980   | 4213.3            | 0.09   |
| 13  |           | a                    | 30.28         |          | 1200.990 | 2400.972        |                  | 800.994  | 1200.987 | 2400.966      | 0.006     | H4N3F1                      | 1200.980-1200.994 | 7758.6            | 0.17   |
|     |           | b                    | 29.87         |          | 1221.501 | 2441.994        |                  |          |          |               | 0.001     |                             | 1221.493-1221.507 | 72722.6           | 1.59   |
| 14  |           | a                    | 30.37         |          | 1221.502 | 2441.996        |                  | 814.670  | 1221.500 | 2441.993      | 0.003     | H3N4F1                      |                   | 299884            | 6.57   |
|     |           | b                    | 29.81         | 814.669  |          | 2441.991        |                  |          |          |               | -0.002    |                             | 814.664-814.674   | 67337.2           | 1.48   |
|     |           | a                    | 30.37         | 814.670  |          | 2441.994        |                  |          |          |               | 0.001     |                             |                   | 166674            | 3.65   |
|     |           | b                    | 29.51         |          | 1302.528 | 2604.048        |                  |          |          |               | 0.003     |                             | 1302.519-1302.535 | 129184            | 2.83   |
| 15  |           | a                    | 30.15         |          | 1302.528 | 2604.048        |                  | 868.687  | 1302.526 | 2604.045      | 0.003     | H4N4F1                      |                   | 385042            | 8.44   |
|     |           | b                    | 29.46         | 868.687  |          | 2604.045        |                  |          |          |               | 0.000     |                             | 868.682-868.692   | 92880.9           | 2.04   |
|     |           | a                    | 30.12         | 868.688  |          | 2604.048        |                  |          |          |               | 0.003     |                             |                   | 331016            | 7.25   |
|     |           | b                    | 30.69         |          | 1323.042 | 2645.076        |                  | 882.363  | 1323.040 | 2645.072      | 0.004     | H3N5F1                      | 1323.032-1323.048 | 2333.2            | 0.05   |
| 16  |           | a                    | 31.10         |          | 1354.537 | 2708.066        |                  | 903.380  | 1354.566 | 2708.125      | -0.059    | H4N3F1G1                    | 1354.524-1354.540 | 3928.8            | 0.09   |
|     |           | b                    | 31.10         | 903.358  |          | 2708.058        |                  |          |          |               | -0.067    |                             | 903.352-903.362   | 3415.8            | 0.07   |
| 17  | a         | 30.03                |               | 922.705  | 2766.099 |                 | 922.705          | 1383.553 | 2766.098 | 0.001         | H5N4F1    | 922.699-922.711             | 77599.7           | 1.70              |        |
|     | b         | 30.23                |               | 1456.075 | 2911.142 |                 |                  |          |          | 0.006         |           | 1456.063-1456.081           | 44562.3           | 0.98              |        |
| 18  | a         | 30.82                |               | 1456.073 | 2911.138 |                 | 971.051          | 1456.072 | 2911.136 | 0.002         | H4N4F1G1  |                             | 26353             | 0.58              |        |
|     | b         | 30.26                | 971.052       |          | 2911.140 |                 |                  |          |          | 0.004         |           | 971.044-971.056             | 63712.1           | 1.40              |        |
|     | a         | 30.90                | 971.051       |          | 2911.137 |                 |                  |          |          | 0.001         |           |                             | 49101.7           | 1.08              |        |
|     | b         | 29.40                | 976.721       |          | 2928.147 |                 | 976.722          | 1464.579 | 2928.151 | -0.004        | H6N4F1    | 976.716-976.728             | 4444.5            | 0.10              |        |
| 19  | a         | 30.12                |               | 1537.102 | 3073.196 |                 |                  |          |          | 0.008         |           | 1537.089-1537.107           | 59372.2           | 1.30              |        |
|     | b         | 30.66                |               | 1537.100 | 3073.192 |                 | 1025.068         | 1537.098 | 3073.188 | 0.004         | H5N4F1G1  |                             | 46171.5           | 1.01              |        |
|     | a         | 30.12                | 1025.069      |          | 3073.191 |                 |                  |          |          | 0.003         |           | 1025.062-1025.074           | 144330            | 3.16              |        |
|     | b         | 30.66                | 1025.069      |          | 3073.191 |                 |                  |          |          | 0.003         |           |                             | 112133            | 2.46              |        |
| 20  | a         | 30.45                |               | 1038.745 | 3114.219 |                 | 1038.744         | 1557.611 | 3114.215 | 0.004         | H4N5F1G1  | 1038.738-1038.750           | 3783.3            | 0.08              |        |
|     | b         | 39.95                | 1079.085      |          | 3235.239 |                 | 1079.086         | 1618.124 | 3235.241 | -0.002        | H6N4F1G1  | 1079.080-1079.092           | 8826.2            | 0.19              |        |
| 21  | a         | 30.52                |               | 1690.649 | 3380.290 |                 |                  |          |          | 0.011         |           | 1690.633-1690.653           | 11978.1           | 0.26              |        |
|     | b         | 31.16                |               | 1690.641 | 3380.274 |                 | 1127.432         | 1690.643 | 3380.279 | -0.005        | H5N4F1G2  |                             | 7260.1            | 0.16              |        |
|     | a         | 30.58                | 1127.433      |          | 3380.283 |                 |                  |          |          | 0.004         |           | 1127.424-1127.438           | 37694.6           | 0.83              |        |
|     | b         | 31.13                | 1127.434      |          | 3380.286 |                 |                  |          |          | 0.007         |           |                             | 243806            | 5.34              |        |
| 22  | a         | 31.67                |               | 786.328  | 2356.968 |                 | 786.327          | 1178.987 | 2356.966 | 0.006         | H3N3F1    | 1178.980-1178.994           | 19257.1           | 0.42              |        |
|     | b         | 31.43                |               | 1260.016 | 2519.024 |                 | 840.345          | 1260.013 | 2519.019 | 0.005         | H4N3F1    | 1260.005-1260.021           | 9329.7            | 0.20              |        |
| 23  | a         | 31.58                |               | 1280.529 | 2560.050 |                 | 854.021          | 1280.527 | 2560.046 | 0.004         | H3N4F1    | 1280.519-1280.535           | 202623            | 4.44              |        |
|     | b         | 31.55                | 854.021       |          | 2560.047 |                 |                  |          |          | 0.001         |           | 854.015-854.025             | 160448            | 3.52              |        |
| 24  | a         | 31.34                |               | 1361.556 | 2722.104 |                 | 908.038          | 1361.553 | 2722.098 | 0.006         | H4N4F1    | 1361.545-1361.561           | 113923            | 2.50              |        |
|     | b         | 31.40                | 908.039       |          | 2722.101 |                 |                  |          |          | 0.003         |           | 908.033-908.043             | 145432            | 3.19              |        |
| 25  | a         | 31.34                |               | 1442.581 | 2884.154 |                 | 962.056          | 1442.579 | 2884.151 | 0.003         | H5N4F1    | 1442.571-1442.589           | 28572.8           | 0.63              |        |
|     | b         | 31.34                | 962.057       |          | 2884.155 |                 |                  |          |          | 0.004         |           | 962.050-962.062             | 51890.9           | 1.14              |        |
| 26  | a         | 32.21                |               | 1515.101 | 3029.194 |                 |                  |          |          | 0.005         |           | 1515.089-1515.107           | 12513.2           | 0.27              |        |
|     | b         | 32.32                | 1010.402      |          | 3029.190 |                 | 1010.402         | 1515.098 | 3029.189 | 0.001         | H4N4F1G1  | 1010.395-1010.407           | 50088.9           | 1.10              |        |
| 27  | a         | 32.10                |               | 1596.129 | 3191.250 |                 | 1064.419         | 1596.125 | 3191.242 | 0.008         | H5N4F1G1  | 1596.115-1596.135           | 10121             | 0.22              |        |
|     | b         | 32.16                | 1064.421      |          | 3191.247 |                 |                  |          |          | 0.005         |           | 1064.413-1064.425           | 33162.2           | 0.73              |        |
| 28  | a         | 32.89                | 1166.784      |          | 3498.336 |                 | 1166.783         | 1749.670 | 3498.332 | 0.004         | H5N4F1G2  | 1166.775-1166.789           | 15851.4           | 0.35              |        |
|     | b         | 31.94                |               | 1207.499 | 2413.990 |                 | 805.335          | 1207.498 | 2413.988 | 0.002         |           | 1207.491-1207.505           | 6028.4            | 0.13              |        |
| 29  | a         | 31.97                | 805.335       |          | 2413.989 |                 |                  |          |          | 0.001         | H3N4      | 805.329-805.339             | 2353.6            | 0.05              |        |
|     | b         |                      |               |          |          |                 |                  |          |          |               |           | total                       | 4564147           | 100               |        |

| No. | peptide       | Retention time (min) | observed mass |          |          | calculated mass | theoretical mass |          |          |        | $\Delta$ mass | Structure         | mass range for EIC ( $\pm$ 6ppm) | Intensity | relative |
|-----|---------------|----------------------|---------------|----------|----------|-----------------|------------------|----------|----------|--------|---------------|-------------------|----------------------------------|-----------|----------|
|     |               |                      | M+4H          | M+3H     | M+2H     | M+H             | M+3H             | M+2H     | M+H      |        |               |                   |                                  |           |          |
| 1   | EEQFNST<br>FR | 36.02                |               | 1118.965 | 2236.922 | 746.313         | 1118.966         | 2236.924 |          |        | -0.002        | H2N3F1            | 1118.959-1118.973                | 1822.9    | 0.13     |
| 2   |               | 36.15                |               | 1199.994 | 2398.980 |                 | 800.331          | 1199.992 | 2398.977 |        | 0.003         | H3N3F1            | 1199.985-1199.999                | 15689.4   | 1.11     |
|     |               | 36.29                | 800.331       | 2398.977 |          |                 |                  |          |          |        | 0.000         |                   | 80.326-800.336                   | 2651.8    | 0.19     |
| 3   |               | 35.93                | 1281.018      | 2561.028 | 854.349  | 1281.019        | 2561.030         |          |          |        | -0.002        | H4N3F1            | 1281.011-1281.027                | 5050.9    | 0.36     |
|     |               | 36.15                |               | 1301.534 | 2602.060 | 868.024         | 1301.532         | 2602.056 |          |        | 0.004         | H3N4F1            | 1301.524-1301.540                | 152752    | 10.84    |
| 4   |               | 36.15                | 868.025       | 2602.059 |          |                 |                  |          |          |        | 0.003         |                   | 868.019-868.029                  | 188721.3  | 13.39    |
|     |               | 35.96                | 1382.560      | 2764.112 |          |                 |                  |          |          |        | 0.003         | H4N4F1            | 1382.550-1382.566                | 60509     | 4.29     |
| 5   |               | 35.93                | 922.042       | 2764.110 | 922.042  | 1382.558        | 2764.109         |          |          |        | 0.001         |                   | 922.036-922.048                  | 109802.2  | 7.79     |
|     |               | 36.12                |               | 1403.071 | 2805.134 | 935.717         | 1403.071         | 2805.135 |          |        | -0.001        | H3N5F1            | 1403.064-1403.080                | 2846.9    | 0.20     |
| 6   |               | 36.12                | 935.718       | 2805.138 |          |                 |                  |          |          |        | 0.003         |                   | 935.711-935.723                  | 12206.3   | 0.87     |
| 7   |               | 37.17                | 956.711       | 2868.117 | 956.712  | 1434.564        | 2868.120         |          |          |        | -0.003        | H4N3F1G1          | 956.706-956.718                  | 1148.5    | 0.08     |
| 8   |               | 35.81                |               | 1463.585 | 2926.162 | 976.059         | 1463.585         | 2926.162 |          |        | 0.000         | H5N4F1            | 1463.576-1463.594                | 11578.7   | 0.82     |
|     | 35.84         | 976.060              | 2926.164      |          |          |                 |                  |          |          | 0.002  |               | 976.053-976.065   | 34199.1                          | 2.43      |          |
| 9   | 36.98         |                      | 1536.105      | 3071.202 | 1024.405 | 1536.103        | 3071.199         |          |          | 0.003  | H4N4F1G1      | 1536.095-1536.113 | 14932.2                          | 1.06      |          |
|     | 37.01         | 1024.406             | 3071.202      |          |          |                 |                  |          |          | 0.003  |               | 1024.399-1024.411 | 70068.2                          | 4.97      |          |
| 10  | 36.77         |                      | 1617.133      | 3233.258 | 1078.423 | 1617.130        | 3233.252         |          |          | 0.006  | H5N4F1G1      | 1617.120-1617.140 | 8465.8                           | 0.60      |          |
|     | 36.74         | 1078.424             | 3233.256      |          |          |                 |                  |          |          | 0.004  |               | 1078.417-1078.429 | 49376.7                          | 3.50      |          |
| 11  | 37.11         | 1092.100             | 3274.284      | 1092.098 | 1637.643 | 3274.279        |                  |          |          | 0.005  | H4N5F1G1      | 1092.091-1092.105 | 1419                             | 0.10      |          |
|     | 36.41         | 1132.441             | 3395.307      | 1132.440 | 1698.156 | 3395.305        |                  |          |          | 0.002  | H6N4F1G1      | 1132.433-1132.447 | 3552.1                           | 0.25      |          |
| 13  | 37.60         |                      | 1770.676      | 3540.344 | 1180.786 | 1770.675        | 3540.342         |          |          | 0.002  | H5N4F1G2      | 1770.664-1770.686 | 2132.6                           | 0.15      |          |
|     | 37.60         | 1180.788             | 3540.348      |          |          |                 |                  |          |          | 0.006  |               | 1180.779-1180.793 | 19728.4                          | 1.40      |          |
| 14  | 36.53         | 1228.506             | 2456.004      | 819.338  | 1228.503 | 2455.998        |                  |          |          | 0.006  | H3N4          | 1228.496-1228.510 | 4105                             | 0.29      |          |
| 15  | 36.26         | 873.355              | 2618.049      | 873.356  | 1309.529 | 2618.051        |                  |          |          | -0.002 | H4N4          | 873.351-873.361   | 2806.2                           | 0.20      |          |
| 16  | a             | 29.95                |               | 1119.964 | 2238.920 |                 |                  |          |          | 0.007  | H3N3F1        | 1119.954-1119.968 | 2300.5                           | 0.16      |          |
|     | b             | 30.51                |               | 1119.963 | 2238.918 | 746.976         | 1119.960         | 2238.913 |          | 0.005  |               |                   | 3181.8                           | 0.23      |          |
| 17  | 30.20         |                      | 1200.987      | 2400.966 | 800.994  | 1200.987        | 2400.966         |          |          | 0.000  | H4N3F1        | 1200.980-1200.994 | 3417.8                           | 0.24      |          |
| 18  | a             | 29.95                |               | 1221.502 | 2441.996 |                 |                  |          |          | 0.003  | H3N4F1        | 1221.493-1221.507 | 35456.5                          | 2.52      |          |
|     | b             | 30.48                |               | 1221.502 | 2441.996 | 814.670         | 1221.500         | 2441.993 |          | 0.003  |               |                   | 32069.7                          | 2.27      |          |
|     | a             | 29.95                | 814.669       | 2441.991 |          |                 |                  |          |          | -0.002 |               |                   | 34834.7                          | 2.47      |          |
|     | b             | 30.54                | 814.670       | 2441.994 |          |                 |                  |          |          | 0.001  |               |                   | 30217.6                          | 2.14      |          |
| 19  | a             | 29.62                |               | 1302.532 | 2604.056 |                 |                  |          |          | 0.011  | H4N4F1        | 1302.519-1302.535 | 17885                            | 1.27      |          |
|     | b             | 30.27                |               | 1302.528 | 2604.048 | 868.687         | 1302.526         | 2604.045 |          | 0.003  |               |                   | 79644.6                          | 5.65      |          |
|     | a             | 30.27                | 868.688       | 2604.048 |          |                 |                  |          |          | 0.003  |               |                   | 94784.5                          | 6.72      |          |
| 20  | 30.17         |                      | 1323.042      | 2645.076 | 882.363  | 1323.040        | 2645.072         |          |          | 0.004  | H3N5F1        | 1323.032-1323.048 | 1578.2                           | 0.11      |          |
| 21  | 30.20         |                      | 1383.554      | 2766.100 |          |                 |                  |          |          | 0.002  | H5N4F1        | 1383.545-1383.561 | 24422.8                          | 1.73      |          |
|     | 30.17         | 922.706              | 2766.102      | 922.705  | 1383.553 | 2766.098        |                  |          |          | 0.004  |               |                   | 31530.5                          | 2.24      |          |
| 22  | 30.04         | 936.380              | 2807.124      | 936.380  | 1404.066 | 2807.125        |                  |          |          | -0.001 | H4N5F1        | 936.374-936.386   | 2171                             | 0.15      |          |
| 23  | a             | 30.30                |               | 1456.073 | 2911.138 |                 |                  |          |          | 0.002  | H4N4F1G1      | 1456.063-1456.081 | 7282.5                           | 0.52      |          |
|     | b             | 30.83                |               | 1456.073 | 2911.138 | 971.051         | 1456.072         | 2911.136 |          | 0.002  |               |                   | 5949.7                           | 0.42      |          |
|     | a             | 30.42                | 971.051       | 2911.137 |          |                 |                  |          |          | 0.001  |               |                   | 18045                            | 1.28      |          |
|     | b             | 30.86                | 971.051       | 2911.137 |          |                 |                  |          |          | 0.001  |               |                   | 15397.5                          | 1.09      |          |
| 24  | 29.42         | 976.723              | 2928.153      | 976.722  | 1464.579 | 2928.151        |                  |          |          | 0.002  | H6N4F1        | 976.716-976.728   | 1194.4                           | 0.08      |          |
| 25  | a             | 30.20                |               | 1537.102 | 3073.196 |                 |                  |          |          | 0.008  | H5N4F1G1      | 1537.089-1537.107 | 7469.7                           | 0.53      |          |
|     | b             | 30.78                |               | 1537.100 | 3073.192 | 1025.068        | 1537.098         | 3073.188 |          | 0.004  |               |                   | 10291.9                          | 0.73      |          |
|     | a             | 30.20                | 1025.069      | 3073.191 |          |                 |                  |          |          | 0.003  |               |                   | 32189.5                          | 2.28      |          |
|     | b             | 30.78                | 1025.068      | 3073.188 |          |                 |                  |          |          | 0.000  |               |                   | 33342.7                          | 2.37      |          |
| 26  | 29.98         | 1079.085             | 3235.239      | 1079.086 | 1618.124 | 3235.241        |                  |          |          | -0.002 | H6N4F1G1      | 1079.080-1079.092 | 2131.6                           | 0.15      |          |
| 27  | b             | 31.16                |               | 1690.642 | 3380.276 |                 |                  |          |          | -0.003 | H5N4F1G2      | 1690.633-1690.653 | 1247.3                           | 0.09      |          |
|     | a             | 30.57                | 1127.433      | 3380.283 | 1127.432 | 1690.643        | 3380.279         |          |          | 0.004  |               |                   | 7387.9                           | 0.52      |          |
|     | b             | 31.19                | 1127.433      | 3380.283 |          |                 |                  |          |          | 0.004  |               |                   | 7896.7                           | 0.56      |          |
| 28  | 31.72         |                      | 1178.990      | 2356.972 | 786.327  | 1178.987        | 2356.966         |          |          | 0.006  | H3N3F1        | 1178.980-1178.994 | 1538.5                           | 0.11      |          |
| 29  | 31.72         |                      | 1280.528      | 2560.048 | 854.021  | 1280.527        | 2560.046         |          |          | 0.002  | H3N4F1        | 854.015-854.025   | 16371.1                          | 1.16      |          |
|     | 31.69         | 854.021              | 2560.047      |          |          |                 |                  |          |          | 0.001  |               |                   | 17934.7                          | 1.27      |          |
| 30  | 31.57         |                      | 1361.555      | 2722.102 | 908.038  | 1361.553        | 2722.098         |          |          | 0.004  | H4N4F1        | 1361.545-1361.561 | 13314.6                          | 0.94      |          |
|     | 31.50         | 908.038              | 2722.098      |          |          |                 |                  |          |          | 0.000  |               |                   | 17113.8                          | 1.21      |          |
| 31  | 31.41         |                      | 1442.581      | 2884.154 | 962.056  | 1442.579        | 2884.151         |          |          | 0.003  | H5N4F1        | 1442.571-1442.589 | 3148.1                           | 0.22      |          |
|     | 31.44         | 962.056              | 2884.152      |          |          |                 |                  |          |          | 0.001  |               |                   | 6937.8                           | 0.49      |          |
| 32  | 32.42         |                      | 1515.100      | 3029.192 | 1010.402 | 1515.098        | 3029.189         |          |          | 0.003  | H4N4F1G1      | 1515.089-1515.107 | 1332.7                           | 0.09      |          |
|     | 32.26         | 1010.403             | 3029.193      |          |          |                 |                  |          |          | 0.004  |               |                   | 4572                             | 0.32      |          |
| 33  | 32.22         |                      | 1596.127      | 3191.246 | 1064.419 | 1596.125        | 3191.242         |          |          | 0.004  | H5N4F1G1      | 1596.115-1596.135 | 1262.1                           | 0.09      |          |
|     | 32.22         | 1064.422             | 3191.250      |          |          |                 |                  |          |          | 0.008  |               |                   | 5380.4                           | 0.38      |          |
| 34  | 32.90         | 1166.782             | 3498.330      | 1166.783 | 1749.670 | 3498.332        |                  |          |          | -0.002 | H5N4F1G2      | 1166.775-1166.789 | 1921.2                           | 0.14      |          |
|     |               |                      |               |          |          |                 |                  |          |          |        |               |                   | total                            | 1409713.8 | 100      |

| No.   | peptide   | Retention time (min) | observed mass |         |          |          | calculated mass |          |          |          | $\Delta$ mass     | Structure         | mass range for EIC ( $\pm$ 6ppm) | Intensity | relative |
|-------|-----------|----------------------|---------------|---------|----------|----------|-----------------|----------|----------|----------|-------------------|-------------------|----------------------------------|-----------|----------|
|       |           |                      | M+4H          | M+3H    | M+2H     | M+H      | M+4H            | M+3H     | M+2H     | M+H      |                   |                   |                                  |           |          |
| 1     | EEQFNSTFR | 36.15                |               |         | 1118.966 | 2236.924 | 746.313         | 1118.966 | 2236.924 | 0.000    | H2N3F1            | 1118.959-1118.973 | 6134.2                           | 0.18      |          |
| 2     |           | 36.09                |               |         | 1199.992 | 2398.976 |                 |          |          | -0.001   | H3N3F1            | 1199.985-1199.999 | 26640.9                          | 0.80      |          |
|       |           | 36.27                | 800.331       |         |          | 2398.977 | 800.331         | 1199.992 | 2398.977 | 0.000    |                   | 800.326-800.336   | 2875.3                           | 0.09      |          |
| 3     |           | 35.90                |               |         | 1281.019 | 2561.030 | 854.349         | 1281.019 | 2561.030 | 0.000    | H4N3F1            | 1281.011-1281.027 | 8871.9                           | 0.27      |          |
| 4     |           | 36.12                |               |         | 1301.534 | 2602.060 |                 |          |          | 0.004    | H3N4F1            | 1301.524-1301.540 | 467532.9                         | 14.08     |          |
|       |           | 36.12                | 868.025       |         |          | 2602.059 | 868.024         | 1301.532 | 2602.056 | 0.003    |                   | 868.019-868.029   | 415323.4                         | 12.51     |          |
| 6     |           | 36.01                |               |         | 1382.560 | 2764.112 |                 |          |          | 0.003    | H4N4F1            | 1382.550-1382.566 | 161489.4                         | 4.86      |          |
|       |           | 35.85                | 922.042       |         |          | 2764.110 | 922.042         | 1382.558 | 2764.109 | 0.001    |                   | 922.036-922.048   | 215627.8                         | 6.49      |          |
| 7     |           | 36.15                |               |         | 1403.073 | 2805.138 |                 |          |          | 0.003    | H3N5F1            | 1403.064-1403.080 | 6686.1                           | 0.20      |          |
|       |           | 36.15                | 935.718       |         |          | 2805.138 | 935.717         | 1403.071 | 2805.135 | 0.003    |                   | 935.711-935.723   | 8841.4                           | 0.27      |          |
| 9     |           | 35.73                |               |         | 1463.586 | 2926.164 |                 |          |          | 0.002    | H5N4F1            | 1463.576-1463.594 | 30056.3                          | 0.91      |          |
|       |           | 35.79                | 976.059       |         |          | 2926.161 | 976.059         | 1463.585 | 2926.162 | -0.001   |                   | 976.053-976.065   | 56050.4                          | 1.69      |          |
| 12    |           | 37.04                |               |         | 1536.105 | 3071.202 | 1024.405        | 1536.103 | 3071.199 | 0.003    | H4N4F1G           | 1536.095-1536.113 | 53135.9                          | 1.60      |          |
|       |           | 37.04                | 1024.406      |         |          | 3071.202 |                 |          |          | 0.003    |                   | 1024.399-1024.411 | 138115                           | 4.16      |          |
| 17    |           | 36.79                |               |         | 1617.131 | 3233.254 | 1078.423        | 1617.130 | 3233.252 | 0.002    | H5N4F1G           | 1617.120-1617.140 | 23973.4                          | 0.72      |          |
|       |           | 36.79                | 1078.424      |         |          | 3233.256 | 1078.423        | 1617.130 | 3233.252 | 0.004    |                   | 1078.417-1078.429 | 78518.2                          | 2.37      |          |
| 18    |           | 37.04                |               |         | 1092.095 | 3274.269 | 1092.098        | 1637.643 | 3274.279 | -0.010   | H4N5F1G           | 1092.091-1092.105 | 2496                             | 0.08      |          |
| 19    |           | 36.41                |               |         | 1132.442 | 3395.310 | 1132.440        | 1698.156 | 3395.305 | 0.005    | H6N4F1G           | 1132.433-1132.447 | 3268.1                           | 0.10      |          |
| 22    |           | 37.59                |               |         | 1770.681 | 3540.354 | 1180.786        | 1770.675 | 3540.342 | 0.012    | H5N4F1G2          | 1770.664-1770.686 | 8494                             | 0.26      |          |
|       |           | 37.64                | 1180.788      |         |          | 3540.348 |                 |          |          | 0.006    |                   | 1180.779-1180.793 | 41487.6                          | 1.25      |          |
| 23    |           | 36.54                |               |         | 1228.508 | 2456.008 | 819.338         | 1228.503 | 2455.998 | 0.010    | H3N4              | 1228.496-1228.510 | 7075.1                           | 0.21      |          |
|       |           | 36.49                | 819.339       |         |          | 2456.001 |                 |          |          | 0.003    |                   | 819.333-819.343   | 5609.9                           | 0.17      |          |
| 24    |           | 36.15                |               |         | 1309.531 | 2618.054 |                 |          |          | 0.003    | H3N4              | 1309.521-1309.537 | 2771.3                           | 0.08      |          |
|       |           | 36.27                | 873.356       |         |          | 2618.052 | 873.356         | 1309.529 | 2618.051 | 0.001    | H4N4              | 873.351-873.361   | 4098.9                           | 0.12      |          |
| 24    |           | 30.47                |               |         | 1119.962 | 2238.916 | 746.976         | 1119.960 | 2238.913 | 0.003    | H3N3F1            | 1119.954-1119.968 | 6347.6                           | 0.19      |          |
| 25    |           | 30.26                |               |         | 1200.989 | 2400.970 | 800.994         | 1200.987 | 2400.966 | 0.004    | H4N3F1            | 1200.980-1200.994 | 3802                             | 0.11      |          |
| 26    |           | a                    | 29.96         |         |          | 1221.500 | 2441.992        |          |          |          | -0.001            |                   | 1221.493-1221.507                | 32942     | 0.99     |
|       |           | b                    | 30.44         |         |          | 1221.502 | 2441.996        | 814.670  | 1221.500 | 2441.993 | 0.003             | H3N4F1            |                                  | 101725.7  | 3.06     |
|       |           | a                    | 29.93         | 814.668 |          | 2441.988 |                 |          |          | -0.005   |                   | 814.664-814.674   | 18503.8                          | 0.56      |          |
|       |           | b                    | 30.37         | 814.669 |          | 2441.991 |                 |          |          | -0.002   |                   |                   | 67644.1                          | 2.04      |          |
| 28    |           | a                    | 29.57         |         |          | 1302.528 | 2604.048        |          |          |          | 0.003             |                   | 1302.519-1302.535                | 146085.7  | 4.40     |
|       |           | b                    | 30.21         |         |          | 1302.528 | 2604.048        | 868.687  | 1302.526 | 2604.045 | 0.003             | H4N4F1            |                                  | 155830.6  | 4.69     |
|       |           | a                    | 29.63         | 868.687 |          | 2604.045 |                 |          |          | 0.000    |                   | 868.682-868.692   | 102496.7                         | 3.09      |          |
|       |           | b                    | 30.21         | 868.687 |          | 2604.045 |                 |          |          | 0.000    |                   |                   | 107958.4                         | 3.25      |          |
| 33    |           | a                    | 31.01         |         |          | 1354.534 | 2708.060        | 903.357  | 1354.532 | 2708.056 | 0.004             | H4N3F1G           | 1354.524-1354.540                | 2702.3    | 0.08     |
|       |           | b                    | 31.04         | 903.357 |          | 2708.055 |                 |          |          | -0.001   |                   | 903.352-903.362   | 1251.8                           | 0.04      |          |
| 31    |           | a                    | 29.54         |         |          | 1383.555 | 2766.102        |          |          |          | 0.004             |                   | 1383.545-1383.561                | 42022.6   | 1.27     |
|       |           | b                    | 30.07         |         |          | 1383.556 | 2766.104        | 922.705  | 1383.553 | 2766.098 | 0.006             | H5N4F1            |                                  | 32490     | 0.98     |
|       |           | a                    | 29.57         | 922.705 |          | 2766.099 |                 |          |          | 0.001    |                   | 922.699-922.711   | 45131.4                          | 1.36      |          |
|       |           | b                    | 30.10         | 922.705 |          | 2766.099 |                 |          |          | 0.001    |                   |                   | 43696.6                          | 1.32      |          |
| 34    |           | a                    | 30.29         |         |          | 1456.074 | 2911.140        |          |          |          | 0.004             |                   | 1456.063-1456.081                | 28610.6   | 0.86     |
|       |           | b                    | 30.81         |         |          | 1456.075 | 2911.142        |          |          |          | 0.006             |                   |                                  | 11914.4   | 0.36     |
|       | a         | 30.29                | 971.051       |         | 2911.137 | 971.051  | 1456.072        | 2911.136 | 0.001    | H4N4F1G1 |                   | 39856.7           | 1.20                             |           |          |
|       | b         | 30.81                | 971.052       |         | 2911.140 |          |                 |          | 0.004    |          | 971.044-971.056   | 21018.6           | 0.63                             |           |          |
| 39    | a         | 30.12                |               |         | 1537.100 | 3073.192 |                 |          |          | 0.004    |                   | 1537.089-1537.107 | 31407.5                          | 0.95      |          |
|       | b         | 30.65                |               |         | 1537.099 | 3073.190 | 1025.068        | 1537.098 | 3073.188 | 0.002    | H5N4F1G1          |                   | 20226.4                          | 0.61      |          |
|       | a         | 30.12                | 1025.069      |         | 3073.191 |          |                 |          | 0.003    |          | 1025.062-1025.074 | 70028.9           | 2.11                             |           |          |
|       | b         | 30.68                | 1025.069      |         | 3073.191 |          |                 |          | 0.003    |          |                   | 38614.7           | 1.16                             |           |          |
| 41    | a         | 30.47                |               |         | 3235.245 | 1079.086 | 1618.124        | 3235.241 | 0.004    | H6N4F1G1 | 1079.080-1079.092 | 2894.2            | 0.09                             |           |          |
|       | b         | 30.63                |               |         | 1690.643 | 3380.278 |                 |          |          | -0.001   |                   | 1690.633-1690.653 | 5842.3                           | 0.18      |          |
|       | a         | 31.15                |               |         | 1690.649 | 3380.290 | 1127.432        | 1690.643 | 3380.279 | 0.011    | H5N4F1G2          |                   | 2239.1                           | 0.07      |          |
|       | b         | 30.63                | 1127.434      |         | 3380.286 |          |                 |          | 0.007    |          | 1127.424-1127.438 | 24749.8           | 0.75                             |           |          |
| 44    | a         | 31.13                | 1127.433      |         | 3380.283 |          |                 |          | 0.004    |          |                   | 14461.2           | 0.44                             |           |          |
|       | b         | 36.62                |               |         | 1310.528 | 2620.048 | 874.019         | 1310.524 | 2620.040 | 0.008    | H5N4              | 1310.516-1310.532 | 15792.4                          | 0.48      |          |
| 45    | a         | 36.59                | 874.020       |         | 2620.044 |          |                 |          | 0.004    |          | 874.014-874.024   | 33541.1           | 1.01                             |           |          |
|       | b         | 31.62                |               |         | 1178.989 | 2356.970 | 786.327         | 1178.987 | 2356.966 | 0.004    | H3N3F1            | 1178.980-1178.994 | 4832.8                           | 0.15      |          |
| 48    | a         | 31.53                |               |         | 1280.528 | 2560.048 | 854.021         | 1280.527 | 2560.046 | 0.002    | H3N4F1            | 1280.519-1280.535 | 60359.8                          | 1.82      |          |
|       | b         | 31.59                | 854.021       |         | 2560.047 |          |                 |          | 0.001    |          | 854.015-854.025   | 55888.3           | 1.68                             |           |          |
| 50    | a         | 31.41                |               |         | 1361.555 | 2722.102 | 908.038         | 1361.553 | 2722.098 | 0.004    | H4N4F1            | 1361.545-1361.561 | 41967.6                          | 1.26      |          |
|       | b         | 31.41                | 908.039       |         | 2722.101 |          |                 |          | 0.003    |          | 908.033-908.043   | 52097.6           | 1.57                             |           |          |
| 53    | a         | 31.35                |               |         | 1442.581 | 2884.154 | 962.056         | 1442.579 | 2884.151 | 0.003    | H5N4F1            | 1442.571-1442.589 | 10538                            | 0.32      |          |
|       | b         | 31.30                | 962.057       |         | 2884.155 |          |                 |          | 0.004    |          | 962.050-962.062   | 19753.7           | 0.59                             |           |          |
| 56    | a         | 32.36                |               |         | 1515.103 | 3029.198 | 1010.402        | 1515.098 | 3029.189 | 0.009    | H4N4F1G           | 1515.089-1515.107 | 5420.8                           | 0.16      |          |
|       | b         | 32.33                | 1010.404      |         | 3029.196 |          |                 |          | 0.007    |          | 1010.395-1010.407 | 11586.1           | 0.35                             |           |          |
| 61    | 32.08     | 1064.423             |               |         | 3191.253 | 1064.419 | 1596.125        | 3191.242 | 0.011    | H5N4F1G1 | 1064.413-1064.425 | 10541.4           | 0.32                             |           |          |
| total |           |                      |               |         |          |          |                 |          |          |          |                   | 3319988.7         | 100                              |           |          |

LC-MS analysis of N-glycans on IgGs obtained from *Fut8*<sup>+/-</sup> mice treated with 1.2 mg/g/day L-fucose on the 7<sup>th</sup> day (C-7).



| No. | peptide   | Retention time (min) | observed mass |          |          |          | calculated mass | theoretical mass |          |          | $\Delta$ mass     | Structure         | mass range for EIC ( $\pm$ 6ppm) | Intensity | relative |
|-----|-----------|----------------------|---------------|----------|----------|----------|-----------------|------------------|----------|----------|-------------------|-------------------|----------------------------------|-----------|----------|
|     |           |                      | M+4H          | M+3H     | M+2H     | M+H      |                 | M+3H             | M+2H     | M+H      |                   |                   |                                  |           |          |
| 1   | EEQFNSTFR | 36.06                |               |          | 1118.967 | 2236.926 | 746.313         | 1118.966         | 2236.924 | 0.002    | H2N3F1            | 1118.959-1118.973 | 5838.8                           | 0.18      |          |
| 2   |           | 36.02                |               |          | 1199.994 | 2398.980 |                 | 800.331          | 1199.992 | 2398.977 | 0.003             | H3N3F1            | 1199.985-1199.999                | 29476.9   | 0.91     |
|     |           | 36.18                | 800.331       |          |          | 2398.977 |                 |                  |          |          | 0.000             |                   | 800.326-800.336                  | 4034.2    | 0.12     |
| 3   |           | 35.87                |               |          | 1281.019 | 2561.030 | 854.349         | 1281.019         | 2561.030 | 0.000    | H4N3F1            | 1281.011-1281.027 | 7543.8                           | 0.23      |          |
|     |           | 36.09                |               |          | 1301.533 | 2602.058 | 868.024         | 1301.532         | 2602.056 | 0.002    | H3N4F1            | 1301.524-1301.540 | 40906.0                          | 12.56     |          |
| 4   |           | 36.02                | 868.024       |          |          | 2602.056 |                 |                  |          |          | 0.000             |                   | 868.019-868.029                  | 42975.3   | 13.20    |
|     |           | 35.82                |               |          | 1382.561 | 2764.114 | 922.042         | 1382.558         | 2764.109 | 0.005    | H4N4F1            | 1382.550-1382.566 | 16324.7                          | 5.01      |          |
| 5   |           | 35.82                | 922.042       |          |          | 2764.110 |                 |                  |          |          | 0.001             |                   | 922.036-922.048                  | 22996.9   | 7.06     |
|     |           | 36.11                |               |          | 1403.074 | 2805.140 | 935.717         | 1403.071         | 2805.135 | 0.005    | H3N5F1            | 1403.064-1403.080 | 5719.9                           | 0.18      |          |
| 6   |           | 36.09                | 935.718       |          |          | 2805.138 |                 |                  |          |          | 0.003             |                   | 935.711-935.723                  | 10239.2   | 0.31     |
|     |           | 37.04                | 956.711       |          |          | 2868.117 | 956.712         | 1434.564         | 2868.120 | -0.003   | H4N3F1G1          | 956.706-956.718   | 2284.2                           | 0.07      |          |
| 8   |           | 35.72                |               |          | 1463.587 | 2926.166 | 976.059         | 1463.585         | 2926.162 | 0.004    | H5N4F1            | 1463.576-1463.594 | 24090.8                          | 0.74      |          |
|     |           | 35.75                | 976.060       |          |          | 2926.164 |                 |                  |          |          | 0.002             |                   | 976.053-976.065                  | 46049.6   | 1.41     |
| 9   |           | 35.82                | 989.733       |          |          | 2967.183 | 989.735         | 1484.098         | 2967.188 | -0.005   | H4N5F1            | 989.729-989.741   | 2670.8                           | 0.08      |          |
|     |           | 36.92                | 1010.732      |          |          | 3030.180 | 1010.730        | 1515.590         | 3030.173 | 0.007    | H5N3F1G1          | 1010.723-1010.735 | 2010.5                           | 0.06      |          |
| 11  |           | 36.95                |               |          | 1536.106 | 3071.204 | 1024.405        | 1536.103         | 3071.199 | 0.005    | H4N4F1G1          | 1536.095-1536.113 | 56405.5                          | 1.73      |          |
|     |           | 36.95                | 1024.406      |          |          | 3071.202 |                 |                  |          |          | 0.003             |                   | 1024.399-1024.411                | 14556.4   | 4.47     |
| 12  |           | 36.67                |               |          | 1617.134 | 3233.260 | 1078.423        | 1617.130         | 3233.252 | 0.008    | H5N4F1G1          | 1617.120-1617.140 | 21574.1                          | 0.66      |          |
|     |           | 36.73                | 1078.424      |          |          | 3233.256 |                 |                  |          |          | 0.004             |                   | 1078.417-1078.429                | 85490.9   | 2.63     |
| 13  |           | 37.50                |               |          | 1770.675 | 3540.342 | 1180.786        | 1770.675         | 3540.342 | 0.000    | H5N4F1G2          | 1770.664-1770.686 | 6115.7                           | 0.19      |          |
|     | 37.50     | 1180.788             |               |          | 3540.348 |          |                 |                  |          | 0.006    |                   | 1180.779-1180.793 | 42236.3                          | 1.30      |          |
| 14  | 36.41     |                      |               | 1228.503 | 2455.998 | 819.338  | 1228.503        | 2455.998         | 0.000    | H3N4     | 1228.496-1228.510 | 5826.8            | 0.18                             |           |          |
| 15  | 36.41     | 819.340              |               |          | 2456.004 |          |                 |                  |          | 0.006    |                   | 819.333-819.343   | 9603.1                           | 0.29      |          |
| 16  | 36.14     |                      |               | 1309.531 | 2618.054 | 873.356  | 1309.529        | 2618.051         | 0.003    | H4N4     | 1309.521-1309.537 | 2930.2            | 0.09                             |           |          |
| 17  | 36.26     | 873.354              |               |          | 2618.046 |          |                 |                  |          | -0.005   |                   | 873.351-873.361   | 2921.4                           | 0.09      |          |
| 18  | 35.75     |                      |               | 1390.558 | 2780.108 | 927.373  | 1390.556        | 2780.104         | 0.004    | H5N4     | 1390.548-1390.564 | 1311.5            | 0.04                             |           |          |
| 19  | 30.50     |                      |               | 1119.962 | 2238.916 | 746.976  | 1119.960        | 2238.913         | 0.003    | H3N3F1   | 1119.954-1119.968 | 5970.2            | 0.18                             |           |          |
| 20  | 30.33     |                      |               | 1200.987 | 2400.966 | 800.994  | 1200.987        | 2400.966         | 0.000    | H4N3F1   | 1200.980-1200.994 | 3131.9            | 0.10                             |           |          |
| 21  | a         | 29.87                |               |          | 1221.499 | 2441.990 |                 |                  |          | -0.003   |                   | 1221.493-1221.507 | 25648.5                          | 0.79      |          |
|     | b         | 30.36                |               |          | 1221.502 | 2441.996 | 814.670         | 1221.500         | 2441.993 | 0.003    | H3N4F1            |                   | 101468                           | 3.12      |          |
|     | a         | 29.81                | 814.669       |          | 2441.991 |          |                 |                  |          | -0.002   |                   | 814.664-814.674   | 21406.9                          | 0.66      |          |
|     | b         | 30.36                | 814.670       |          | 2441.994 |          |                 |                  |          | 0.001    |                   |                   | 78311.6                          | 2.40      |          |
| 22  | a         | 29.55                |               |          | 1302.528 | 2604.048 |                 |                  |          | 0.003    |                   | 1302.519-1302.535 | 17652.4                          | 5.42      |          |
|     | b         | 30.15                |               |          | 1302.528 | 2604.048 | 868.687         | 1302.526         | 2604.045 | 0.003    | H4N4F1            |                   | 145738                           | 4.48      |          |
|     | a         | 29.52                | 868.687       |          | 2604.045 |          |                 |                  |          | 0.000    |                   | 868.682-868.692   | 142518                           | 4.38      |          |
|     | b         | 30.12                | 868.688       |          | 2604.048 |          |                 |                  |          | 0.003    |                   |                   | 131016                           | 4.02      |          |
| 23  | a         | 29.52                |               |          | 1383.555 | 2766.102 |                 |                  |          | 0.004    |                   | 1383.545-1383.561 | 43454.2                          | 1.33      |          |
|     | b         | 30.12                |               |          | 1383.555 | 2766.102 | 922.705         | 1383.553         | 2766.098 | 0.004    | H5N4F1            |                   | 30779.2                          | 0.95      |          |
|     | a         | 29.52                | 922.705       |          | 2766.099 |          |                 |                  |          | 0.001    |                   | 922.699-922.711   | 52068.3                          | 1.60      |          |
|     | b         | 30.12                | 922.705       |          | 2766.099 |          |                 |                  |          | 0.001    |                   |                   | 30911.9                          | 0.95      |          |
| 24  | a         | 30.24                |               |          | 1456.074 | 2911.140 |                 |                  |          | 0.004    |                   | 1456.063-1456.081 | 22809.1                          | 0.70      |          |
|     | b         | 30.80                |               |          | 1456.074 | 2911.140 | 971.051         | 1456.072         | 2911.136 | 0.004    | H4N4F1G1          |                   | 12571.3                          | 0.39      |          |
|     | a         | 30.21                | 971.052       |          | 2911.140 |          |                 |                  |          | 0.004    |                   | 971.044-971.056   | 39897.7                          | 1.23      |          |
|     | b         | 30.88                | 971.052       |          | 2911.140 |          |                 |                  |          | 0.004    |                   |                   | 25099.8                          | 0.77      |          |
| 25  | 29.46     | 976.722              |               |          | 2928.150 | 976.722  | 1464.579        | 2928.151         | -0.001   | H6N4F1   | 976.76-976.728    | 2095.1            | 0.06                             |           |          |
| 26  | a         | 30.15                |               |          | 1537.100 | 3073.192 |                 |                  |          | 0.004    |                   | 1537.089-1537.107 | 26193.7                          | 0.80      |          |
|     | b         | 30.65                |               |          | 1537.102 | 3073.196 | 1025.068        | 1537.098         | 3073.188 | 0.008    | H5N4F1G1          |                   | 16940.4                          | 0.52      |          |
|     | a         | 30.12                | 1025.069      |          | 3073.191 |          |                 |                  |          | 0.003    |                   | 1025.062-1025.074 | 72971.7                          | 2.24      |          |
|     | b         | 30.65                | 1025.069      |          | 3073.191 |          |                 |                  |          | 0.003    |                   |                   | 43026.5                          | 1.32      |          |
| 27  | 30.47     | 1079.091             |               |          | 3235.257 | 1079.086 | 1618.124        | 3235.241         | 0.016    | H6N4F1G1 | 1079.080-1079.092 | 1899              | 0.06                             |           |          |
| 28  | a         | 30.65                |               |          | 1690.644 | 3380.280 |                 |                  |          | 0.001    |                   | 1690.633-1690.653 | 5756.6                           | 0.18      |          |
|     | b         | 31.22                |               |          | 1690.648 | 3380.288 | 1127.432        | 1690.643         | 3380.279 | 0.009    | H5N4F1G2          |                   | 1518.5                           | 0.05      |          |
|     | a         | 30.59                | 1127.433      |          | 3380.283 |          |                 |                  |          | 0.004    |                   | 1127.424-1127.438 | 17690.6                          | 0.54      |          |
|     | b         | 31.19                | 1127.433      |          | 3380.283 |          |                 |                  |          | 0.004    |                   |                   | 10756.7                          | 0.33      |          |
| 29  | 30.27     |                      |               | 1383.046 | 2765.084 | 922.365  | 1383.043        | 2765.078         | 0.006    | H4N4G1   | 1383.038-1383.054 | 1059.4            | 0.03                             |           |          |
| 30  | 31.65     |                      |               | 1178.991 | 2356.974 | 786.327  | 1178.987        | 2356.966         | 0.008    | H3N3F1   | 1178.980-1178.994 | 4478.8            | 0.14                             |           |          |
| 31  | 31.65     | 786.325              |               |          | 2356.959 |          |                 |                  |          | -0.007   |                   | 786.322-786.332   | 1150                             | 0.04      |          |
|     | 31.44     |                      |               | 1260.012 | 2519.016 | 840.345  | 1260.013        | 2519.019         | -0.003   | H4N3F1   | 1260.005-1260.021 | 2657.9            | 0.08                             |           |          |
| 32  | 31.62     |                      |               | 1280.528 | 2560.048 | 854.021  | 1280.527        | 2560.046         | 0.002    | H3N4F1   | 1280.519-1280.535 | 5002.3            | 1.54                             |           |          |
|     | 31.62     | 854.021              |               |          | 2560.047 |          |                 |                  |          | 0.001    |                   | 854.015-854.025   | 47557.9                          | 1.46      |          |
| 33  | 31.40     |                      |               | 1361.555 | 2722.102 | 908.038  | 1361.553        | 2722.098         | 0.004    | H4N4F1   | 1361.545-1361.561 | 30395.7           | 0.93                             |           |          |
|     | 31.40     | 908.039              |               |          | 2722.101 |          |                 |                  |          | 0.003    |                   | 908.033-908.043   | 38510.2                          | 1.18      |          |
| 34  | 31.28     |                      |               | 1442.582 | 2884.156 | 962.056  | 1442.579        | 2884.151         | 0.005    | H5N4F1   | 1442.571-1442.589 | 7320.9            | 0.22                             |           |          |
| 35  | 32.39     |                      |               | 1515.104 | 3029.200 | 1010.402 | 1515.098        | 3029.189         | 0.011    | H4N4F1G1 | 1515.089-1515.107 | 2768.8            | 0.09                             |           |          |
|     | 32.33     | 1010.402             |               |          | 3029.190 |          |                 |                  |          | 0.001    |                   | 1010.395-1010.407 | 10150.6                          | 0.31      |          |
| 36  | 32.12     |                      |               | 1596.130 | 3191.252 | 1064.419 | 1596.125        | 3191.242         | 0.010    | H5N4F1G1 | 1596.115-1596.135 | 2112              | 0.06                             |           |          |
|     | 32.21     | 1064.421             |               |          | 3191.247 |          |                 |                  |          | 0.005    |                   | 1064.413-1064.425 | 12993.3                          | 0.40      |          |
| 37  | 32.82     |                      |               |          | 3498.336 | 1166.783 | 1749.670        | 3498.332         | 0.004    | H5N4F1G2 | 1166.775-1166.789 | 5042.4            | 0.15                             |           |          |
|     |           |                      |               |          |          |          |                 |                  |          |          |                   | total             | 3256361                          | 100       |          |

## Supplemental Table10

**Relative levels of fucosylated and none fucosylated *N*-glycans on IgGs obtained from *Fut8*<sup>+/-</sup> mice treated with or without L-fucose at indicated doses**

|                                    | Relative Abundance[%] |        |        |
|------------------------------------|-----------------------|--------|--------|
|                                    | A-0                   | A-7    | A-14   |
| fucosylated glycan                 | 98.30                 | 99.42  | 99.33  |
| none fucosylated glycan            | 1.70                  | 0.58   | 0.67   |
| total                              | 100.00                | 100.00 | 100.00 |
| A: 0.15 mg/g/day; 0, 7, or 14 days |                       |        |        |
|                                    | Relative Abundance[%] |        |        |
|                                    | B-0                   | B-7    | B-14   |
| fucosylated glycan                 | 98.94                 | 99.25  | 99.33  |
| none fucosylated glycan            | 1.06                  | 0.75   | 0.67   |
| total                              | 100.00                | 100.00 | 100.00 |
| B: 0.4 mg/g/day; 0, 7, or 14 days  |                       |        |        |
|                                    | Relative Abundance[%] |        |        |
|                                    | C-0                   | C-7    | C-14   |
| fucosylated glycan                 | 99.51                 | 99.41  | 99.31  |
| none fucosylated glycan            | 0.49                  | 0.59   | 0.69   |
| total                              | 100.00                | 100.00 | 100.00 |
| C: 1.2 mg/g/day; 0, 7, or 14 days  |                       |        |        |

# Supplemental Table11

## A comparison of IgG subclass and Igk levels in Fut8<sup>+/-</sup> mice treated with or without L-fucose at indicated doses

| WT and Hetero | Intensity |          |
|---------------|-----------|----------|
|               | WT        | Hetero   |
| MS raw data   | 21080404  | 21080405 |
| IgG1          | 518000    | 119000   |
| IgG2          | 3350000   | 598000   |
| IgG3          | 314000    | 211000   |
| IgK           | 4880000   | 564000   |

| Hetero Fut8 <sup>+/-</sup><br>A: 0.15 mg/g/day | Intensity |          |          |
|------------------------------------------------|-----------|----------|----------|
|                                                | 0 day     | 7 day    | 14 day   |
| MS raw data                                    | 21091602  | 21091605 | 21091608 |
| IgG1                                           | 221000    | 417000   | 859000   |
| IgG2                                           | 943000    | 2520000  | 4740000  |
| IgG3                                           | 254000    | 1140000  | 2310000  |
| IgK                                            | 792000    | 2410000  | 4530000  |

| Hetero Fut8 <sup>+/-</sup><br>B: 0.4 mg/g/day | Intensity |          |          |
|-----------------------------------------------|-----------|----------|----------|
|                                               | 0 day     | 7 day    | 14 day   |
| MS raw data                                   | 21091603  | 21091606 | 21091609 |
| IgG1                                          | 204000    | 386000   | 553000   |
| IgG2                                          | 1310000   | 3390000  | 4740000  |
| IgG3                                          | 824000    | 2500000  | 3100000  |
| IgK                                           | 1410000   | 3280000  | 4700000  |

| Hetero Fut8 <sup>+/-</sup><br>C: 1.2 mg/g/day | Intensity |          |          |
|-----------------------------------------------|-----------|----------|----------|
|                                               | 0 day     | 7 day    | 14 day   |
| MS raw data                                   | 21091604  | 21091607 | 21091610 |
| IgG1                                          | 358000    | 759000   | 788000   |
| IgG2                                          | 736000    | 3140000  | 2430000  |
| IgG3                                          | 233000    | 909000   | 642000   |
| IgK                                           | 1260000   | 3550000  | 3650000  |

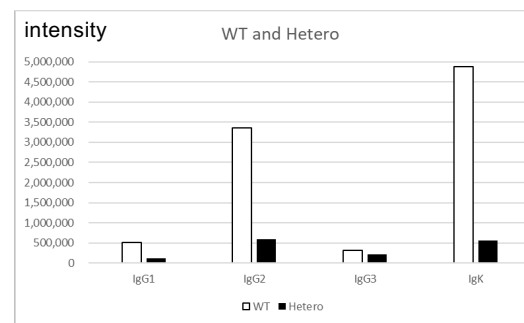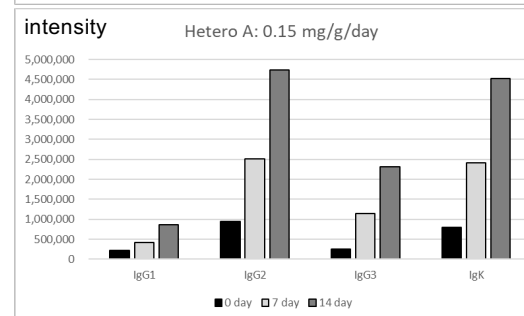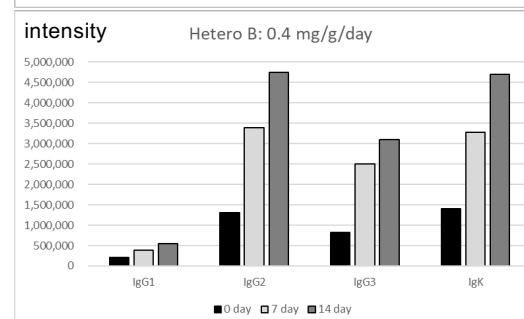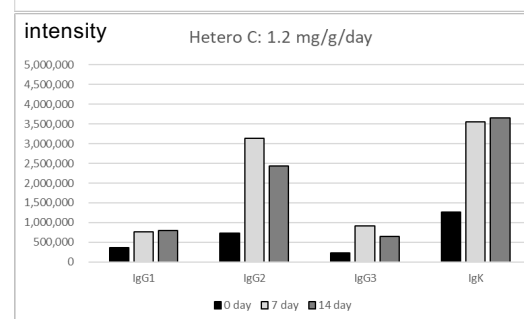

Supplement: mmc2.pdf [file mmc2.pdf]
